# Supplementary material for: Digested casein phosphopeptides impact intestinal calcium transport in vitro
Source: Royal Society of Chemistry journal article supplement (doi:10.1039/d4fo01637h), 2024-01-01
Supplement: d4fo01637h1.xlsx [file d4fo01637h1.xlsx]

## Sheet: CPPpreparation
Uniprot access number | protein acronym	Amino acid sequences of identified peptides	Peaks Studio score (-10log P)	Theoretical monoisotopic mass (Da)	Length	ppm	m/z	z	Retention time	Start	End	Post-translational modifications	AScore	Found By
P02662|CASA1_BOVIN	K.HPIKHQGLPQEVLNENLLR.F	69.03	2234.23	19	6	745.755	3	30.23	19	37			PEAKS DB
	K.HPIKHQGLPQE(+21.98)VLNENLLR.F	45.95	2256.21	19	4.9	753.081	3	29.86	19	37	Sodium adduct	E11:Sodium adduct:14.58	PEAKS PTM
	K.HPIKHQGLP(+31.99)QEVLNENLLR.F	38.81	2266.22	19	4	756.42	3	32.76	19	37	Dihydroxy	P9:Dihydroxy:8.15	PEAKS PTM
	K.HPIKHQGLPQE(+37.03)VLNENLLR.F	36.83	2271.26	19	1.8	568.823	4	29.91	19	37	Propargylamine	E11:Propargylamine:11.12	PEAKS PTM
	P.IKHQGLPQEVLNENLLR.F	45	2000.12	17	5.1	667.716	3	31.6	21	37			PEAKS DB
	K.HQGLPQEVLNENLLR.F	95.07	1758.94	15	3.3	880.479	2	34.02	23	37			PEAKS DB
	K.HQGLPQEVLN(-17.03)ENLLR.F	81.63	1741.91	15	7.1	581.648	3	33.5	23	37	Ammonia-loss (N)	N10:Ammonia-loss (N):26.31	PEAKS PTM
	K.HQGLPQE(+21.98)VLNENLLR.F	76.19	1780.92	15	1.8	594.648	3	33.16	23	37	Sodium adduct	E7:Sodium adduct:59.24	PEAKS PTM
	K.HQGLPQEVLNE(+21.98)NLLR.F	63.68	1780.92	15	1.6	891.468	2	33.49	23	37	Sodium adduct	E11:Sodium adduct:15.39	PEAKS PTM
	K.HQGLPQEVLNEN(-17.03)LLR.F	61.81	1741.91	15	5.6	581.648	3	33.54	23	37	Ammonia-loss (N)	N12:Ammonia-loss (N):0.00	PEAKS PTM
	K.H(+27.99)QGLPQEVLNENLLR.F	61.81	1786.93	15	3.3	894.476	2	36.65	23	37	Formylation	H1:Formylation:1000.00	PEAKS PTM
	K.HQGLPQEVLNE(+21.98)NLL.R	55.77	1624.82	14	1.5	813.418	2	37.08	23	36	Sodium adduct	E11:Sodium adduct:28.36	PEAKS PTM
	K.HQGLPQE(+37.95)VLNENLLR.F	55.77	1796.88	15	6.8	899.456	2	33.22	23	37	Replacement of 2 protons by calcium	E7:Replacement of 2 protons by calcium:14.19	PEAKS PTM
	K.HQGLPQEVLN(-18.01).E	55.55	1115.57	10	-1.3	558.793	2	33.54	23	32	Dehydration	N10:Dehydration:1000.00	PEAKS PTM
	K.HQGLPQEVLNENLL.R	48.86	1602.84	14	4.7	802.429	2	36.64	23	36			PEAKS DB
	K.HQGLPQEVLNENLL(+21.98).R	48.37	1624.82	14	1	813.417	2	36.69	23	36	Sodium adduct	L14:Sodium adduct:22.34	PEAKS PTM
	K.HQGLPQEVLNEN(-18.01).L	47.49	1358.66	12	4.4	680.339	2	33.23	23	34	Dehydration	N12:Dehydration:1000.00	PEAKS PTM
	K.HQGLPQE(+37.96)VLNENLLR.F	34.21	1796.89	15	4.8	599.975	3	33.46	23	37	Replacement of proton by potassium	E7:Replacement of proton by potassium:31.20	PEAKS PTM
	H.QGLPQEVLNENLLR.F	58.86	1621.88	14	0.1	811.947	2	36.85	24	37			PEAKS DB
	Q.GLPQEVLNENLLR.F	75.55	1493.82	13	4.1	747.92	2	36.8	25	37			PEAKS DB
	Q.GLPQE(+21.98)VLNENLLR.F	40.77	1515.8	13	3.2	758.911	2	36.73	25	37	Sodium adduct	E5:Sodium adduct:16.51	PEAKS PTM
	L.PQEVLNENLLR.F	66.36	1323.71	11	0.9	662.865	2	36.73	27	37			PEAKS DB
	L.PQEVLN(-17.03)ENLLR.F	38.65	1306.69	11	4.1	654.354	2	33.28	27	37	Ammonia-loss (N)	N6:Ammonia-loss (N):14.04	PEAKS PTM
	Q.EVLNENLLR.F	42.19	1098.6	9	4.5	1099.62	1	33.58	29	37			PEAKS DB
	E.VLNENLLR.F	43.88	969.561	8	-3.4	485.786	2	33.59	30	37			PEAKS DB
	V.LNEN(-17.03)LLR.F	41.59	853.466	7	1.9	854.475	1	33.54	31	37	Ammonia-loss (N)	N4:Ammonia-loss (N):21.68	PEAKS PTM
	V.LNENLLR.F	38.43	870.492	7	-0.7	871.499	1	28.88	31	37			PEAKS DB
	R.FFVAPFPEVFGKEK.V	93.02	1640.86	14	6.2	1641.88	1	40.39	38	51			PEAKS DB
	R.FFVAPFPE(+21.98)VFGKEK.V	79.23	1662.84	14	2.6	832.431	2	40.73	38	51	Sodium adduct	E8:Sodium adduct:49.68	PEAKS PTM
	R.FFVAPFPEVF.G	69.52	1198.61	10	-7.8	1199.6	1	47.78	38	47			PEAKS DB
	R.FFVAPFPEVFGKEK(+27.99).V	68.4	1668.86	14	1.4	835.436	2	44.66	38	51	Formylation	K14:Formylation:13.67	PEAKS PTM
	R.FFVAPFPEVFG.K	59.34	1255.63	11	6.9	1256.64	1	47.68	38	48			PEAKS DB
	R.FFVAPFPE(+21.98)VFGK.E	52.35	1405.7	12	0.1	703.86	2	44.88	38	49	Sodium adduct	E8:Sodium adduct:37.48	PEAKS PTM
	R.FFVAPFPE(+37.96)VFGKEK.V	43.95	1678.82	14	4.1	840.419	2	40.76	38	51	Replacement of proton by potassium	E8:Replacement of proton by potassium:56.99	PEAKS PTM
	R.FFVAPFPEVFGK(+108.02)EK.V	41.73	1748.88	14	5	875.452	2	40.15	38	51	HydroxymethylOP	K12:HydroxymethylOP:18.53	PEAKS PTM
	R.FFVAPFPE(+37.95)VFGKEK.V	37.07	1678.81	14	8.6	840.418	2	40.37	38	51	Replacement of 2 protons by calcium	E8:Replacement of 2 protons by calcium:61.30	PEAKS PTM
	R.FFVAPFPEVFGKEKV.N	36.93	1739.93	15	4.6	580.986	3	42.12	38	52			PEAKS DB
	R.FFVAPFPE(+57.02)VF.G	35.35	1255.63	10	3.9	1256.64	1	47.76	38	47	Carbamidomethylation (DHKE X@N-term)	E8:Carbamidomethylation (DHKE X@N-term):44.27	PEAKS PTM
	F.FVAPFPEVFGKEK.V	72.2	1493.79	13	2.6	747.905	2	40.7	39	51			PEAKS DB
	F.FVAPFPE(+21.98)VFGKEK.V	57.55	1515.77	13	1	758.895	2	36.51	39	51	Sodium adduct	E7:Sodium adduct:26.93	PEAKS PTM
	F.F(+225.09)VAPFPEVFGKEK.V	53.98	1718.89	13	-4.6	573.966	3	39.13	39	51	Iminobiotinylation	F1:Iminobiotinylation:91.60	PEAKS PTM
	F.VAPFPEVFGKEK.V	58.9	1346.72	12	3.7	674.371	2	40.77	40	51			PEAKS DB
	F.VAPFPEVFGK(+108.02)EK.V	35.66	1454.74	12	5.9	728.384	2	39.72	40	51	HydroxymethylOP	K10:HydroxymethylOP:0.00	PEAKS PTM
	V.APFPEVFGKEK.V	71.84	1247.65	11	3	1248.67	1	40.76	41	51			PEAKS DB
	V.APFPEVFGK.E	53.3	990.517	9	0.9	991.526	1	44.5	41	49			PEAKS DB
	A.PFPEVFGKEK.V	69.46	1176.62	10	-0.3	1177.62	1	36.2	42	51			PEAKS DB
	A.PFPEVFGK.E	50.31	919.48	8	-0.5	920.487	1	44.86	42	49			PEAKS DB
	P.FPEVFGKEK.V	66.84	1079.57	9	2.3	1080.57	1	40.73	43	51			PEAKS DB
	F.PEVFGKEK.V	58.78	932.497	8	5.6	933.509	1	40.3	44	51			PEAKS DB
	P.EVFGKEK.V	48.23	835.444	7	1	836.452	1	40.35	45	51			PEAKS DB
	E.KVNELSK(+31.99)DIGSESTEDQAMEDIK.Q	37.59	2597.2	23	-1.9	866.743	3	30.59	51	73	Dihydroxy	K7:Dihydroxy:0.00	PEAKS PTM
	K.VNELSKDIGS(+79.97)ES(+79.97)TEDQAMEDIK.Q	64.9	2597.05	22	4.5	866.694	3	31.29	52	73	Phosphorylation (STY)	S10:Phosphorylation (STY):14.84;S12:Phosphorylation (STY):11.06	PEAKS PTM
	K.VNELSKDIGS(+79.97)EST(+79.97)EDQAMEDIK.Q	61.01	2597.05	22	4.5	866.694	3	31.27	52	73	Phosphorylation (STY)	S10:Phosphorylation (STY):0.00;T13:Phosphorylation (STY):0.00	PEAKS PTM
	K.DIGS(+79.97)ES(+79.97)TEDQAMEDIK.Q	53.91	1926.68	16	1.6	964.351	2	29.39	58	73	Phosphorylation (STY)	S4:Phosphorylation (STY):19.05;S6:Phosphorylation (STY):10.11	PEAKS PTM
	K.HIQKEDVPSER.Y	69.63	1336.67	11	5	1337.69	1	17.35	95	105			PEAKS DB
	K.H(+42.01)IQKEDVPSER.Y	65.29	1378.68	11	2.2	460.57	3	19.62	95	105	Acetylation (N-term)	H1:Acetylation (N-term):1000.00	PEAKS PTM
	K.HIQKED(-18.01)VPSER.Y	60.42	1318.66	11	3.9	440.563	3	16.43	95	105	Dehydration	D6:Dehydration:62.26	PEAKS PTM
	K.HIQKE(+21.98)DVPSER.Y	54.24	1358.66	11	3.4	680.337	2	16.4	95	105	Sodium adduct	E5:Sodium adduct:20.92	PEAKS PTM
	K.HIQKED(+21.98)VPSER.Y	48.82	1358.66	11	3.4	680.337	2	16.42	95	105	Sodium adduct	D6:Sodium adduct:8.69	PEAKS PTM
	K.HIQKED(-18.01)V.P	46.32	849.434	7	0.5	850.442	1	17.3	95	101	Dehydration	D6:Dehydration:1000.00	PEAKS PTM
	H.IQKEDVPSER.Y	55.41	1199.61	10	2.7	600.816	2	17.37	96	105			PEAKS DB
	I.QKEDVPSER.Y	50.27	1086.53	9	0.8	544.273	2	16.55	97	105			PEAKS DB
	R.YLGYLEQLLRLK.K	69.53	1507.88	12	5.2	754.949	2	44.02	106	117			PEAKS DB
	R.YLGYLEQLLRLKKYKVPQLE(+21.98).I	59.61	2515.42	20	-4.6	839.476	3	48.33	106	125	Sodium adduct	E20:Sodium adduct:36.69	PEAKS PTM
	R.YLGYLEQLLR.L	58.44	1266.7	10	6.4	1267.71	1	42.71	106	115			PEAKS DB
	R.Y(-18.01)LGYLEQLLR.L	55.62	1248.69	10	7.8	625.356	2	42.47	106	115	Dehydration	Y1:Dehydration:38.16	PEAKS PTM
	R.YLGYLEQLLRL.K	51.92	1379.78	11	1.8	690.899	2	47.48	106	116			PEAKS DB
	R.YLGYLEQL.L	50.58	997.512	8	2.8	998.522	1	39.04	106	113			PEAKS DB
	R.YLGYLEQLL.R	47.24	1110.6	9	2.7	1111.61	1	46.41	106	114			PEAKS DB
	R.YLGYLE(+21.98)QLLR.L	46.15	1288.68	10	-2.4	645.345	2	42.33	106	115	Sodium adduct	E6:Sodium adduct:82.24	PEAKS PTM
	R.YLGYLEQ.L	46.1	884.428	7	0.7	885.436	1	30.01	106	112			PEAKS DB
	R.YLGYLEQ(-18.01).L	41.16	866.417	7	3.4	867.428	1	46.48	106	112	Dehydration	Q7:Dehydration:42.60	PEAKS PTM
	R.YLGYLE(+37.95)QLLR.L	35.43	1304.64	10	4.9	653.333	2	42.77	106	115	Replacement of 2 protons by calcium	E6:Replacement of 2 protons by calcium:84.63	PEAKS PTM
	R.YLGYLEQLLRLKKYKVPQLE(+21.97).I	34.66	2515.41	20	-5	839.471	3	48.3	106	125	Replacement of 2 protons by magnesium	E20:Replacement of 2 protons by magnesium:19.56	PEAKS PTM
	Y.LGYLEQLLRLK.K	62.31	1344.81	11	4.9	673.417	2	43.95	107	117			PEAKS DB
	Y.LGYLEQLLR.L	48.99	1103.63	9	-1.7	552.823	2	38.6	107	115			PEAKS DB
	L.GYLEQLLRLK.K	52.1	1231.73	10	4.4	616.874	2	43.9	108	117			PEAKS DB
	L.GYLEQLLR.L	43.29	990.55	8	-1.4	991.556	1	42.31	108	115			PEAKS DB
	K.YKVPQLEIVPNS(+79.97)AEER.L	78.85	1950.95	16	5.4	976.485	2	32.12	119	134	Phosphorylation (STY)	S12:Phosphorylation (STY):136.85	PEAKS PTM
	K.YKVPQLEIVPNS(-18.01)AEER.L	69.58	1852.97	16	-1.1	927.49	2	32.67	119	134	Dehydration	S12:Dehydration:127.06	PEAKS PTM
	K.YKVPQLEIVPNSAEER.L	66.32	1870.98	16	3.2	936.5	2	31.6	119	134			PEAKS DB
	K.YKVPQLEIVPNS(+79.97)AEERLH.S	45.03	2201.09	18	9.4	734.71	3	33.46	119	136	Phosphorylation (STY)	S12:Phosphorylation (STY):53.12	PEAKS PTM
	K.YKVPQ(+.98)LEIVPNS(+79.97)AEER.L	37.41	1951.93	16	7.5	651.655	3	33.24	119	134	Deamidation (NQ); Phosphorylation (STY)	Q5:Deamidation (NQ):11.66;S12:Phosphorylation (STY):24.15	PEAKS PTM
	K.VPQLEIVPNS(+79.97)AEER.L	105.22	1659.79	14	7.9	830.907	2	31.17	121	134	Phosphorylation (STY)	S10:Phosphorylation (STY):1000.00	PEAKS PTM
	K.VPQLEIVPNS(-18.01)AEER.L	71.59	1561.81	14	-0.7	521.61	3	30.68	121	134	Dehydration	S10:Dehydration:1000.00	PEAKS PTM
	K.VPQLEIVPNSAEER.L	68.71	1579.82	14	3.3	790.92	2	30.1	121	134			PEAKS DB
	K.VPQLEIVPN(-17.03)SAEER.L	64.02	1562.79	14	6.1	782.409	2	31.3	121	134	Ammonia-loss (N)	N9:Ammonia-loss (N):1000.00	PEAKS PTM
	K.VPQLEIVPNS(+79.97)AEERLH.S	56.85	1909.93	16	0.5	637.651	3	32.28	121	136	Phosphorylation (STY)	S10:Phosphorylation (STY):1000.00	PEAKS PTM
	K.VPQLEIVPNS(+79.97)AEERLHSMK.E	46.48	2256.1	19	8.9	753.046	3	32.82	121	139	Phosphorylation (STY)	S10:Phosphorylation (STY):15.08	PEAKS PTM
	K.VPQLEIVPNSAEER(+80.99).L	45.05	1660.81	14	-8.7	831.403	2	31.27	121	134	Arginine replacement by Nitropyrimidyl ornithine	R14:Arginine replacement by Nitropyrimidyl ornithine:1000.00	PEAKS PTM
	K.VPQLE(+21.98)IVPNSAEER.L	39.87	1601.8	14	-0.6	801.908	2	30.35	121	134	Sodium adduct	E5:Sodium adduct:26.08	PEAKS PTM
	K.VPQLEIVPNS(+79.97)AEERLHSM.K	37.93	2128	18	5.8	710.346	3	36	121	138	Phosphorylation (STY)	S10:Phosphorylation (STY):6.08	PEAKS PTM
	V.PQLEIVPNS(+79.97)AEER.L	83.52	1560.72	13	1.8	781.368	2	32.32	122	134	Phosphorylation (STY)	S9:Phosphorylation (STY):1000.00	PEAKS PTM
	P.QLEIVPNS(+79.97)AEER.L	65.87	1463.67	12	5.7	732.844	2	27.43	123	134	Phosphorylation (STY)	S8:Phosphorylation (STY):1000.00	PEAKS PTM
	Q.LEIVPNS(+79.97)AEER.L	50.3	1335.61	11	-0.8	668.81	2	26.73	124	134	Phosphorylation (STY)	S7:Phosphorylation (STY):1000.00	PEAKS PTM
	L.EIVPNS(+79.97)AEER.L	60.3	1222.52	10	-6.4	1223.52	1	31.21	125	134	Phosphorylation (STY)	S6:Phosphorylation (STY):1000.00	PEAKS PTM
	L.EIVPNS(-18.01)AEER.L	49.77	1124.55	10	-5.5	1125.55	1	31.23	125	134	Dehydration	S6:Dehydration:1000.00	PEAKS PTM
	E.IVPNS(+79.97)AEER.L	61.93	1093.48	9	1	1094.49	1	31.18	126	134	Phosphorylation (STY)	S5:Phosphorylation (STY):1000.00	PEAKS PTM
	I.VPNS(+79.97)AEER.L	76.42	980.396	8	0.8	981.404	1	31.13	127	134	Phosphorylation (STY)	S4:Phosphorylation (STY):1000.00	PEAKS PTM
	V.PNS(+79.97)AEER.L	74.41	881.328	7	0	882.335	1	32.15	128	134	Phosphorylation (STY)	S3:Phosphorylation (STY):1000.00	PEAKS PTM
	V.PNS(+79.97)AEERLHSMK.E	65.88	1477.64	12	-1.1	739.826	2	32.84	128	139	Phosphorylation (STY)	S3:Phosphorylation (STY):22.71	PEAKS PTM
	V.PNS(-18.01)AEER.L	62.12	783.351	7	4.4	784.362	1	30.67	128	134	Dehydration	S3:Dehydration:1000.00	PEAKS PTM
	V.PN(+.98)S(+79.97)AEER.L	47.77	882.312	7	7.9	883.326	1	31.85	128	134	Deamidation (NQ); Phosphorylation (STY)	N2:Deamidation (NQ):1000.00;S3:Phosphorylation (STY):1000.00	PEAKS PTM
	V.PNSAEER.L	47.22	801.362	7	5.3	802.373	1	31.1	128	134			PEAKS DB
	R.LHSMKEGIHAQQKEPMIGVNQELAYFYPELFR.Q	48.9	3802.9	32	8	761.593	5	42.02	135	166			PEAKS DB
	R.LHSMKEGIHAQQKEPMIGVNQ(+.98)ELAYFYPELFR.Q	47.91	3803.88	32	9.3	1268.98	3	41.65	135	166	Deamidation (NQ)	Q21:Deamidation (NQ):10.71	PEAKS PTM
	R.LHSMKEGIHAQQKEPMIGVNQELAY(-18.01)F.Y	42.45	2979.47	26	5.6	745.88	4	41.32	135	160	Dehydration	Y25:Dehydration:61.10	PEAKS PTM
	R.LHSMKEGIHAQQKEPMIGVNQELAY(-18.01).F	36.37	2832.41	25	9.8	709.115	4	41.71	135	159	Dehydration	Y25:Dehydration:19.01	PEAKS PTM
	R.LHSMKEGIHAQQKEPM(+15.99)IGVNQELAYFYPELFR.Q	34.24	3818.89	32	4	955.734	4	41.65	135	166	Oxidation (M)	M16:Oxidation (M):11.59	PEAKS DB
	K.EGIHAQQKEPM(+15.99)IGVNQELAYFYPELFR.Q	53.38	3222.58	27	7.3	806.658	4	44.76	140	166	Oxidation (M)	M11:Oxidation (M):1000.00	PEAKS DB
	K.EGIHAQQKEPMIGVNQELAYFYPELFR.Q	44	3206.59	27	1.8	1069.87	3	44.2	140	166			PEAKS DB
	K.E(-18.01)GIHAQQK.E	38.53	891.456	8	3.1	446.737	2	12.6	140	147	Pyro-glu from E	E1:Pyro-glu from E:1000.00	PEAKS PTM
	K.EGIHAQQKEPMIGVNQELAY(-18.01)F.Y	36.36	2383.16	21	2.1	795.397	3	44.32	140	160	Dehydration	Y20:Dehydration:1000.00	PEAKS PTM
	K.EPMIGVNQELAYFYPELFR.Q	96.63	2315.13	19	5.9	1158.58	2	47.36	148	166			PEAKS DB
	M.IGVNQELAYFYPELFR.Q	78.05	1957.99	16	7.8	980.012	2	47.05	151	166			PEAKS DB
	N.QELAYFYPELFR.Q	50.21	1574.78	12	4.6	788.399	2	43.39	155	166			PEAKS DB
	Q.ELAYFYPELFR.Q	56.77	1446.72	11	6.2	724.371	2	43.56	156	166			PEAKS DB
	Y.FYPELFR.Q	36.46	970.491	7	2.6	971.501	1	41.26	160	166			PEAKS DB
	R.QFYQLDAYPSGAWYYVPLGTQYTDAPSFSDIPNPIGSENSEKTTMPLW	55.22	5444.52	48	8.9	1815.86	3	47.5	167	214			PEAKS DB
	F.SDIPNPIGSENSEKTTMPLW	47.86	2215.05	20	-6	1108.52	2	39.9	195	214			PEAKS DB
	I.PNPIGSENSEKTTMPLW	45.19	1899.9	17	2	950.961	2	47.84	198	214			PEAKS DB
	N.PIGSENSEKTTMPLW	49.5	1688.81	15	-3.9	845.408	2	35.08	200	214			PEAKS DB
P02666|CASB_BOVIN	A.RELEELNVPGEIVESLSS(+79.97)S(+79.97)EESITR.I	67.25	2961.33	25	6.5	988.122	3	40.4	16	40	Phosphorylation (STY)	S18:Phosphorylation (STY):0.00;S19:Phosphorylation (STY):0.00	PEAKS PTM
	K.KIEKFQS(+79.97)EEQQQTEDELQDK.I	72.42	2559.14	20	3.6	854.056	3	24.48	44	63	Phosphorylation (STY)	S7:Phosphorylation (STY):66.36	PEAKS PTM
	K.KIEKFQSEEQQQT(+79.97)EDELQDK.I	60.95	2559.14	20	4.8	1280.58	2	24.92	44	63	Phosphorylation (STY)	T13:Phosphorylation (STY):0.00	PEAKS PTM
	K.IEKFQS(+79.97)EEQQQTEDELQDK.I	57.58	2431.04	19	7.1	811.361	3	26.07	45	63	Phosphorylation (STY)	S6:Phosphorylation (STY):49.54	PEAKS PTM
	K.FQS(+79.97)EEQQQTEDELQDK.I	76.47	2060.82	16	6.3	1031.42	2	25.07	48	63	Phosphorylation (STY)	S3:Phosphorylation (STY):108.21	PEAKS PTM
	K.FQSEEQQQTEDELQDK.I	67.13	1980.85	16	0.9	991.436	2	23.69	48	63			PEAKS DB
	K.FQS(+79.97)EEQQQTEDELQDKIHPF.A	43.92	2555.09	20	8.3	852.709	3	34.97	48	67	Phosphorylation (STY)	S3:Phosphorylation (STY):22.09	PEAKS PTM
	K.IHPFAQTQSLVYPFPGPIPNSLPQNIPPLTQTPVVVPPFLQPEVMGVSK.V	55.37	5315.85	49	9.7	1329.98	4	47.4	64	112			PEAKS DB
	N.SLPQNIPPLTQTPVVVPPFLQPEVMGVSK.V	34.68	3111.7	29	-2	1038.24	3	47.17	84	112			PEAKS DB
	I.PPLTQTPVVVPPFLQPEVMGVSKVK.E	44.11	2686.51	25	4.9	896.516	3	47.02	90	114			PEAKS DB
	V.PPFLQPEVMGVSK.V	83.66	1427.75	13	9.9	1428.77	1	47.07	100	112			PEAKS PTM
	L.QPEVMGVSK(+28.03).V	34.52	1001.52	9	8.2	501.772	2	33.48	104	112	Dimethylation(KR)	K9:Dimethylation(KR):1000.00	PEAKS PTM
	K.VKEAMAPK.H	50.03	872.479	8	-3	873.484	1	15.23	113	120			PEAKS DB
	K.VK(+108.02)EAMAPK.H	43.93	980.5	8	-0.7	491.257	2	15.44	113	120	HydroxymethylOP	K2:HydroxymethylOP:77.93	PEAKS PTM
	V.KEAMAPK.H	40.89	773.41	7	2.2	387.713	2	14.62	114	120			PEAKS DB
	K.HKEMPFPK.Y	60.76	1012.52	8	-0.5	1013.52	1	20.49	121	128			PEAKS DB
	K.HKEMPFPK(+21.98).Y	47.68	1034.5	8	2.6	518.258	2	19.95	121	128	Sodium adduct	K8:Sodium adduct:56.51	PEAKS PTM
	H.K(+111.03)EMPFPK.Y	49.29	986.49	7	2.3	494.253	2	25.86	122	128	Nmethylmaleimide	K1:Nmethylmaleimide:77.93	PEAKS PTM
	K.YPVEPFTESQSLTLTDVENLHLPLPLLQSW.M	86.1	3465.77	30	3.7	1156.27	3	47.74	129	158			PEAKS DB
	K.YPVEPFTESQSLTLTDVENLHLPLPLLQSWMHQPHQPLPPTVMFPPQSVLSLSQSK.V	74.04	6358.25	56	10	1272.67	5	47.39	129	184			PEAKS DB
	K.YPVEPFTESQSLTLTDVENLHLPLPLLQ.S	47.57	3192.66	28	2	1065.23	3	47.62	129	156			PEAKS DB
	K.YPVEPFTESQSLTLTDVENLHLPLPLL.Q	44.91	3064.6	27	3.1	1022.54	3	47.72	129	155			PEAKS DB
	K.YPVEPFTESQSL(+21.98).T	43.73	1417.64	12	-0.5	709.826	2	35.42	129	140	Sodium adduct	L12:Sodium adduct:5.26	PEAKS PTM
	K.YPVEPFTE(+21.98)SQSL.T	40.44	1417.64	12	-0.5	709.826	2	35.42	129	140	Sodium adduct	E8:Sodium adduct:0.00	PEAKS PTM
	K.YPVEPFTESQSLTLTDVENLHLPLPLLQSWM(+15.99)HQPHQPLPPTVMFPPQSVLSLSQSK.V	34.13	6374.24	56	6.3	1275.86	5	47.31	129	184	Oxidation (M)	M31:Oxidation (M):14.81	PEAKS DB
	T.DVENLHLPLPLLQSWMHQPHQPLPPTVMFPPQSVLSLSQSK.V	47.88	4665.42	41	8	934.1	5	47.29	144	184			PEAKS DB
	W.MHQPHQPLPPTVMFPPQSVLSLSQSK.V	50.77	2910.49	26	9.2	728.636	4	37.94	159	184			PEAKS DB
	F.PPQSVLSLSQSK.V	73.7	1269.69	12	2.7	635.855	2	47.34	173	184			PEAKS DB
	V.LSLSQSK.V	35.04	761.428	7	-6.5	762.431	1	23.96	178	184			PEAKS DB
	K.VLPVPQKAVPYPQRDMPIQAFLLYQEPVLGPVRGPFPIIV	77.88	4481.51	40	9.6	1121.39	4	47.38	185	224			PEAKS DB
	K.VLPVPQKAVPYPQR.D	57.34	1590.92	14	0.9	796.47	2	26.46	185	198			PEAKS DB
	K.VLPVPQK.A	42.24	779.49	7	2.3	780.5	1	22.25	185	191			PEAKS DB
	K.VLPVPQKAVPYPQRDMPIQAFLLYQEPVLGPVR.G	41.31	3758.07	33	-0.9	940.525	4	44.37	185	217			PEAKS DB
	L.PVPQKAVPYPQR.D	62.86	1378.77	12	-0.5	690.393	2	26.43	187	198			PEAKS DB
	V.PQKAVPYPQR.D	63	1182.65	10	2	592.334	2	26.5	189	198			PEAKS DB
	K.AVPYPQRDMPIQAFLLYQEPVLGPVRGPFPIIV(-.98)	70.87	3719.04	33	7.8	1240.7	3	47.55	192	224	Amidation	V33:Amidation:1000.00	PEAKS PTM
	K.AVPYPQRDMPIQAFLLYQEPVLGPVRGPFPIIV	54.71	3720.03	33	9.5	931.023	4	47.55	192	224			PEAKS DB
	K.AVPYPQRDMPIQAFLL.Y	54.5	1857.98	16	6.6	930.004	2	45.38	192	207			PEAKS DB
	K.AVPYPQRDMPIQAFLLYQEPVLGPVR.G	46.71	2996.59	26	5.7	999.878	3	45.54	192	217			PEAKS DB
	K.AVPYPQR.D	43.17	829.445	7	5.9	830.457	1	20.91	192	198			PEAKS DB
	K.AVPYPQRDMPIQAFLLY(-18.01)QE.P	42.74	2260.14	19	7.7	1131.08	2	47.59	192	210	Dehydration	Y17:Dehydration:77.07	PEAKS PTM
	K.AVPYPQRDMPIQAF.L	35.77	1631.81	14	3.3	816.916	2	35.3	192	205			PEAKS DB
	K.AVPYPQRDMPIQAFLLY.Q	35.22	2021.04	17	-1.2	1011.53	2	46.19	192	208			PEAKS DB
	R.DMPIQAFLLYQEPVLGPVRGPFPIIV	114.48	2908.59	26	8.3	1455.32	2	47.89	199	224			PEAKS DB
	R.DMPIQAFLLYQEPVLGPVR.G	108.23	2185.16	19	7.1	1093.6	2	47.35	199	217			PEAKS DB
	R.DMPIQAFLLYQE(+21.98)PVLGPVRGPFPIIV	91.96	2930.57	26	6.4	977.872	3	47.93	199	224	Sodium adduct	E12:Sodium adduct:80.11	PEAKS PTM
	R.DM(+15.99)PIQAFLLYQEPVLGPVRGPFPIIV	57.08	2924.59	26	4.6	975.874	3	47.75	199	224	Oxidation (M)	M2:Oxidation (M):1000.00	PEAKS DB
	R.DMPIQAFLLYQE(+37.96)PVLGPVRGPFPIIV	49.32	2946.55	26	4.6	983.195	3	47.93	199	224	Replacement of proton by potassium	E12:Replacement of proton by potassium:36.69	PEAKS PTM
	R.DMPIQAFLL.Y	43.93	1046.55	9	4.4	1047.56	1	47.56	199	207			PEAKS DB
	R.D(+1572.99)MPIQAFLLYQEPVLGPVR.G	42.74	3758.15	19	-3	940.541	4	44.78	199	217	Molybdenum bis(molybdopterin guanine dinucleotide)	D1:Molybdenum bis(molybdopterin guanine dinucleotide):1000.00	PEAKS PTM
	R.DMPIQAFLLYQEPVLGPVRGPFPII.V	39.92	2809.52	25	0.7	937.516	3	47.91	199	223			PEAKS DB
	R.DMPIQAFLLY(-.98).Q	35.8	1208.63	10	0.4	1209.63	1	47.69	199	208	Amidation	Y10:Amidation:1000.00	PEAKS PTM
	F.LLYQEPVLGPVR.G	56.26	1382.79	12	1.4	692.404	2	33.37	206	217			PEAKS DB
	L.LYQEPVLGPVRGPFPIIV	61.29	1993.14	18	5.3	997.583	2	46.71	207	224			PEAKS DB
	L.LYQEPVLGPVR.G	53.68	1269.71	11	3.7	635.864	2	29.14	207	217			PEAKS DB
	L.YQEPVLGPVRGPFPIIV	75.79	1880.06	17	4.5	941.039	2	45.37	208	224			PEAKS DB
	Y.Q(-17.03)EPVLGPVRGPFPIIV	63.45	1699.97	16	4.3	850.994	2	47.6	209	224	Pyro-glu from Q	Q1:Pyro-glu from Q:1000.00	PEAKS PTM
	Y.QEPVLGPVRGPFPIIV	59.6	1716.99	16	6.7	859.509	2	44.75	209	224			PEAKS DB
	R.GPFPIIV	38.79	741.442	7	-6.5	742.445	1	41.92	218	224			PEAKS DB
P02663|CASA2_BOVIN	K.NMAINPSKENLCS(-2.02)TFCKEVVR.N	45.58	2380.13	21	7	1191.08	2	33.03	40	60	2-amino-3-oxo-butanoic_acid	S13:2-amino-3-oxo-butanoic_acid:8.14	PEAKS PTM
	K.NMAINPSKENLCST(-2.02)FCKEVVR.N	45.47	2380.13	21	2.5	1191.08	2	33.4	40	60	2-amino-3-oxo-butanoic_acid	T14:2-amino-3-oxo-butanoic_acid:0.00	PEAKS PTM
	K.NMAINPSKENLCS(-20.03)TFCKEVVR.N	37.81	2362.12	21	6.6	591.542	4	35.44	40	60	Formation of five membered aromatic heterocycle	S13:Formation of five membered aromatic heterocycle:0.00	PEAKS PTM
	K.NMAINPS(+77.99)KENLCSTFCKEVVR.N	35.3	2460.14	21	-9.5	1231.06	2	35.42	40	60	Methylphosphonylation	S7:Methylphosphonylation:4.67	PEAKS PTM
	K.NMAINPS(-2.02)KENLCSTFCKEVVR.N	34.94	2380.13	21	0.5	794.386	3	33.26	40	60	2-amino-3-oxo-butanoic_acid	S7:2-amino-3-oxo-butanoic_acid:14.32	PEAKS PTM
	K.NMAINPSKENLCSTFC(-20.03)KEVVR.N	34.4	2362.12	21	3.4	788.384	3	35.44	40	60	Formation of five membered aromatic heterocycle	C16:Formation of five membered aromatic heterocycle:0.00	PEAKS PTM
	M.AINPSKENLCST(-2.02)FCKEVVR.N	50.57	2135.05	19	9.6	712.698	3	33.32	42	60	2-amino-3-oxo-butanoic_acid	T12:2-amino-3-oxo-butanoic_acid:0.00	PEAKS PTM
	M.AINPSKENLCS(-2.02)TFCKEVVR.N	35.76	2135.05	19	9.6	712.698	3	33.31	42	60	2-amino-3-oxo-butanoic_acid	S11:2-amino-3-oxo-butanoic_acid:0.00	PEAKS PTM
	A.INPSKENLCST(-2.02)FCKEVVR.N	43.56	2064.01	18	4	689.014	3	33.38	43	60	2-amino-3-oxo-butanoic_acid	T11:2-amino-3-oxo-butanoic_acid:0.00	PEAKS PTM
	A.INPSKENLCS(-2.02)TFCKEVVR.N	37.41	2064.01	18	4	689.014	3	33.4	43	60	2-amino-3-oxo-butanoic_acid	S10:2-amino-3-oxo-butanoic_acid:14.02	PEAKS PTM
	I.NPSKENLCST(-2.02)FCKEVVR.N	35.01	1950.93	17	1.4	976.473	2	33.37	44	60	2-amino-3-oxo-butanoic_acid	T10:2-amino-3-oxo-butanoic_acid:7.21	PEAKS PTM
	N.PSKENLCST(-2.02)FCKEVVR.N	49.92	1836.89	16	7.8	919.457	2	33.33	45	60	2-amino-3-oxo-butanoic_acid	T9:2-amino-3-oxo-butanoic_acid:0.00	PEAKS PTM
	N.PSKENLCS(-2.02)TFCKEVVR.N	44.68	1836.89	16	3.6	919.454	2	32.95	45	60	2-amino-3-oxo-butanoic_acid	S8:2-amino-3-oxo-butanoic_acid:0.00	PEAKS PTM
	K.ALNEINQFYQK.F	72.88	1366.69	11	5.7	1367.7	1	29.5	96	106			PEAKS DB
	K.ALNEIN(+.98)QFYQK.F	60.72	1367.67	11	3.2	684.846	2	27.06	96	106	Deamidation (NQ)	N6:Deamidation (NQ):21.94	PEAKS PTM
	K.ALN(+.98)EINQFYQK.F	51.17	1367.67	11	2.4	684.845	2	28.77	96	106	Deamidation (NQ)	N3:Deamidation (NQ):37.54	PEAKS PTM
	K.ALNE(+21.98)INQFYQK.F	50.38	1388.67	11	4.8	695.346	2	29.09	96	106	Sodium adduct	E4:Sodium adduct:66.44	PEAKS PTM
	K.ALNEINQF.Y	35.56	947.471	8	5.8	948.484	1	30.94	96	103			PEAKS DB
	L.NEINQFYQK.F	56.47	1182.57	9	2.4	1183.58	1	29.56	98	106			PEAKS DB
	N.EINQFYQK.F	53.64	1068.52	8	4.6	1069.54	1	29.15	99	106			PEAKS DB
	E.INQFYQK.F	51.08	939.481	7	3.2	940.492	1	29.52	100	106			PEAKS DB
	K.FPQYLQYLYQGPIVLNPWDQVK(+156.12).R	100.75	2864.52	22	6.9	1433.27	2	47.12	107	128	4-hydroxynonenal (HNE)	K22:4-hydroxynonenal (HNE):1000.00	PEAKS PTM
	K.FPQYLQYLYQGPIVLNPWDQVKR.N	75.32	2864.5	23	7	717.138	4	47.12	107	129			PEAKS DB
	K.FPQYLQY.L	43.42	957.46	7	-0.7	958.466	1	35.05	107	113			PEAKS DB
	K.FPQYLQYL.Y	39.8	1070.54	8	2.8	1071.55	1	43.13	107	114			PEAKS DB
	K.FPQYLQYLYQGPIVLNPWD(+21.98)QVKR.N	35.81	2886.48	23	6.2	963.174	3	47.07	107	129	Sodium adduct	D19:Sodium adduct:28.70	PEAKS PTM
	P.QYLQYLYQGPIVLNPWDQVKR.N	61.24	2620.38	21	0.8	874.468	3	43.51	109	129			PEAKS DB
	P.QYLQYLYQGPIVLNPWDQVK(+156.12).R	34.8	2620.39	20	4.8	874.476	3	43.1	109	128	4-hydroxynonenal (HNE)	K20:4-hydroxynonenal (HNE):1000.00	PEAKS PTM
	Q.YLQYLYQGPIVLNPWDQVKR.N	68.44	2492.32	20	8.5	831.788	3	42.53	110	129			PEAKS DB
	Q.YLQYLYQGPIVLNPWDQVK(+156.12).R	54.24	2492.34	19	4.6	831.79	3	42.92	110	128	4-hydroxynonenal (HNE)	K19:4-hydroxynonenal (HNE):1000.00	PEAKS PTM
	Q.YLYQGPIVLNPWDQVKR.N	50.03	2088.12	17	8.2	697.052	3	38.89	113	129			PEAKS DB
	Y.LYQGPIVLNPWDQVKR.N	68.43	1925.05	16	-3.7	963.53	2	37.13	114	129			PEAKS DB
	Y.LYQGPIVLNPWDQVK.R	46.21	1768.95	15	-2.3	885.481	2	39.8	114	128			PEAKS DB
	L.YQGPIVLNPWDQVK.R	62.3	1655.87	14	-0.7	828.94	2	38.37	115	128			PEAKS DB
	L.YQGPIVLNPWDQVKR.N	60.05	1811.97	15	2.1	906.993	2	47.08	115	129			PEAKS DB
	Y.QGPIVLNPWDQVKR.N	63.72	1648.9	14	-1.8	825.458	2	36.79	116	129			PEAKS DB
	Q.GPIVLNPWDQVKR.N	68.13	1520.85	13	7.2	761.436	2	34.85	117	129			PEAKS DB
	G.PIVLNPWDQVKR.N	64.93	1463.82	12	-2.8	732.918	2	47.08	118	129			PEAKS DB
	V.K(+41.03)RNAVPITPTLNR.E	34.72	1519.89	13	-5.3	507.639	3	26.07	128	140	Amidination of lysines or N-terminal amines with methyl acetimidate	K1:Amidination of lysines or N-terminal amines with methyl acetimidate:1000.00	PEAKS PTM
	R.NAVPITPTLNR.E	62.56	1194.67	11	5.8	1195.69	1	26.63	130	140			PEAKS DB
	R.NAVPITPT(+79.97)LNREQLSTS(+79.97)EENSK.K	45.95	2587.16	22	6	863.398	3	28.17	130	151	Phosphorylation (STY)	T8:Phosphorylation (STY):0.00;S17:Phosphorylation (STY):0.00	PEAKS PTM
	R.NAVPIT(+79.97)PTLNREQLSTS(+79.97)EENSK.K	43.33	2587.16	22	6	863.398	3	28.14	130	151	Phosphorylation (STY)	T6:Phosphorylation (STY):0.00;S17:Phosphorylation (STY):1.10	PEAKS PTM
	V.PITPTLNREQLS(+79.97)TS(+79.97)EENSK.K	64.98	2303.01	19	8.8	1152.52	2	28.63	133	151	Phosphorylation (STY)	S12:Phosphorylation (STY):10.11;S14:Phosphorylation (STY):33.98	PEAKS PTM
	V.PITPTLNREQLST(+79.97)S(+79.97)EENSKK.T	61.03	2431.1	20	7.6	1216.57	2	26.79	133	152	Phosphorylation (STY)	T13:Phosphorylation (STY):7.65;S14:Phosphorylation (STY):5.03	PEAKS PTM
	V.PITPTLNREQLS(+79.97)T(+79.97)SEENSKK.T	52.64	2431.1	20	6.8	1216.57	2	27.28	133	152	Phosphorylation (STY)	S12:Phosphorylation (STY):0.00;T13:Phosphorylation (STY):0.00	PEAKS PTM
	V.PITPTLNR.E	51.05	910.524	8	2.3	911.533	1	26.56	133	140			PEAKS DB
	V.PITPTLNREQLS(+79.97)TS(+79.97)EENSKK.T	37.93	2431.1	20	7.6	1216.57	2	26.79	133	152	Phosphorylation (STY)	S12:Phosphorylation (STY):0.00;S14:Phosphorylation (STY):0.00	PEAKS PTM
	V.PITPTLNREQLS(+79.97)T(+79.97)SEENSK.K	37.12	2303.01	19	6.8	1152.52	2	28.27	133	151	Phosphorylation (STY)	S12:Phosphorylation (STY):0.00;T13:Phosphorylation (STY):0.00	PEAKS PTM
	R.EQLSTS(+79.97)EENSKK.T	50.72	1458.62	12	0.1	730.319	2	15.89	141	152	Phosphorylation (STY)	S6:Phosphorylation (STY):0.00	PEAKS PTM
	R.EQLSTSEENS(+79.97)K.K	43.64	1330.53	11	3.8	666.274	2	18.08	141	151	Phosphorylation (STY)	S10:Phosphorylation (STY):0.00	PEAKS PTM
	R.EQLS(+79.97)TS(+79.97)EENSKK.T	43.35	1538.59	12	-0.3	770.302	2	16.05	141	152	Phosphorylation (STY)	S4:Phosphorylation (STY):0.00;S6:Phosphorylation (STY):12.28	PEAKS PTM
	R.EQLSTS(+79.97)EENSK.K	42.98	1330.53	11	3.8	666.274	2	18.08	141	151	Phosphorylation (STY)	S6:Phosphorylation (STY):6.59	PEAKS PTM
	R.EQLS(+79.97)TSEENSKK.T	40.52	1458.62	12	8.9	730.326	2	16.76	141	152	Phosphorylation (STY)	S4:Phosphorylation (STY):14.02	PEAKS PTM
	R.EQLS(+79.97)TS(+79.97)EENSK.K	38.37	1410.5	11	6.2	706.259	2	16.75	141	151	Phosphorylation (STY)	S4:Phosphorylation (STY):7.21;S6:Phosphorylation (STY):8.14	PEAKS PTM
	K.KTVDMES(+79.97)TEVFTK.K	78.12	1593.7	13	4.9	797.861	2	26.1	152	164	Phosphorylation (STY)	S7:Phosphorylation (STY):21.94	PEAKS PTM
	K.KTVDMES(+79.97)TEVFTKK.T	75.42	1721.79	14	2.9	574.941	3	24.4	152	165	Phosphorylation (STY)	S7:Phosphorylation (STY):12.28	PEAKS PTM
	K.KTVDMEST(+79.97)EVFTKK.T	65.74	1721.79	14	7.5	861.911	2	24.83	152	165	Phosphorylation (STY)	T8:Phosphorylation (STY):10.11	PEAKS PTM
	K.KTVDMES(-18.01)TEVFTK.K	35.21	1495.72	13	1.5	499.582	3	26.12	152	164	Dehydration	S7:Dehydration:10.11	PEAKS PTM
	K.KTVDMEST(-18.01)EVFTK.K	34.3	1495.72	13	0.7	499.582	3	26.52	152	164	Dehydration	T8:Dehydration:0.00	PEAKS PTM
	K.TVDMES(+79.97)TEVFTK.K	88.15	1465.6	12	1.2	1466.61	1	28.7	153	164	Phosphorylation (STY)	S6:Phosphorylation (STY):24.44	PEAKS PTM
	K.TVDM(+15.99)ES(+79.97)TEVFTK.K	60.44	1481.6	12	4.5	741.811	2	28.68	153	164	Oxidation (M); Phosphorylation (STY)	M4:Oxidation (M):1000.00;S6:Phosphorylation (STY):9.34	PEAKS PTM
	K.TVDM(+15.99)EST(+79.97)EVFTK.K	55.95	1481.6	12	4.5	741.811	2	28.66	153	164	Oxidation (M); Phosphorylation (STY)	M4:Oxidation (M):1000.00;T7:Phosphorylation (STY):0.00	PEAKS PTM
	K.TVDMESTEVFTK.K	43.49	1385.64	12	3.2	693.829	2	27.98	153	164			PEAKS DB
	V.DMES(+79.97)TEVFTK.K	81.93	1265.49	10	5.4	1266.5	1	28.28	155	164	Phosphorylation (STY)	S4:Phosphorylation (STY):11.06	PEAKS PTM
	V.DMES(+79.97)TEVFTKK.T	69.04	1393.58	11	0.8	697.8	2	26.63	155	165	Phosphorylation (STY)	S4:Phosphorylation (STY):17.01	PEAKS PTM
	V.DMES(-18.01)TEVFTKK.T	34.53	1295.61	11	-5.2	648.807	2	26.26	155	165	Dehydration	S4:Dehydration:0.00	PEAKS PTM
	K.TKLTEEEKNR.L	44.86	1246.65	10	2.1	624.335	2	15.1	166	175			PEAKS DB
	K.LTEEEKNR.L	44.4	1017.51	8	-1.3	509.761	2	12.9	168	175			PEAKS DB
	K.LTE(+21.98)EEKNR.L	38.3	1039.49	8	-7.4	520.749	2	12.96	168	175	Sodium adduct	E3:Sodium adduct:24.44	PEAKS PTM
	Q.KFALPQYLK.T	37.64	1106.65	9	0.3	554.332	2	30.49	188	196			PEAKS DB
	K.FALPQYLK.T	51.45	978.554	8	-0.3	979.561	1	34.32	189	196			PEAKS DB
	K.FALPQYL.K	38.76	850.459	7	-7	851.46	1	41.01	189	195			PEAKS DB
	K.FALPQYLK(+44.03).T	37.62	1022.58	8	-3.3	1023.59	1	33.72	189	196	Ethanolation (KR)	K8:Ethanolation (KR):1000.00	PEAKS PTM
	F.ALPQYLK.T	42.98	831.485	7	-0.3	832.492	1	25.79	190	196			PEAKS DB
	K.TVYQHQK.A	49.93	902.461	7	1.9	903.47	1	12.88	197	203			PEAKS DB
	K.AMKPWIQPK.T	46.92	1097.61	9	3	549.812	2	24.38	204	212			PEAKS DB
	K.AMK(+108.02)PWIQPK.T	37.27	1205.63	9	1.7	603.822	2	24.1	204	212	HydroxymethylOP	K3:HydroxymethylOP:63.13	PEAKS PTM
	M.KPWIQPK.T	36.35	895.528	7	-1.4	448.771	2	24.78	206	212			PEAKS DB
	K.TKVIPYVR.Y	46.03	974.591	8	-1.2	975.597	1	23.77	213	220			PEAKS DB
P02754|LACB_BOVIN	A.LIVTQTMKGLDIQK.V	66	1586.91	14	-1.9	794.459	2	30.88	17	30			PEAKS DB
	A.LIVTQTMK.G	57.26	932.537	8	3	933.547	1	24.27	17	24			PEAKS DB
	L.IVTQTMK.G	52.45	819.452	7	1	820.461	1	23.85	18	24			PEAKS DB
	L.IVTQTMKGLDIQK.V	50.37	1473.82	13	5.9	737.923	2	30.51	18	30			PEAKS DB
	I.VTQTMKGLDIQK.V	43.14	1360.74	12	3	681.379	2	30.86	19	30			PEAKS DB
	K.GLDIQKVAGTWYSLAMAASDISLLDAQSAPLR.V	43.13	3360.74	32	3.8	841.195	4	47.71	25	56			PEAKS DB
	K.VAGTWYSLAMAASDISLLDAQSAPLR.V	112.79	2706.37	26	9.1	903.138	3	47.5	31	56			PEAKS DB
	K.VAGTWYSLAMAASD(+21.98)ISLLDAQSAPLR.V	104.92	2728.35	26	4.8	910.462	3	47.51	31	56	Sodium adduct	D14:Sodium adduct:111.23	PEAKS PTM
	Y.SLAMAASDISLLDAQSAPLR.V	90.45	2029.05	20	-1.7	1015.53	2	39.83	37	56			PEAKS DB
	Y.SLAMAASD(+21.98)ISLLDAQSAPLR.V	58.26	2051.03	20	4.7	684.688	3	39.87	37	56	Sodium adduct	D8:Sodium adduct:17.91	PEAKS PTM
	L.AMAASDISLLDAQSAPLR.V	68.42	1828.94	18	2.5	915.477	2	35.71	39	56			PEAKS DB
	A.MAASDISLLDAQSAPLR.V	93.5	1757.9	17	6	879.962	2	35.57	40	56			PEAKS DB
	A.MAASDISLLD(+21.98)AQSAPLR.V	40.17	1779.88	17	3.3	594.303	3	35.62	40	56	Sodium adduct	D10:Sodium adduct:17.91	PEAKS PTM
	R.VYVEELKPTPEGDLEILLQK.W	35.66	2312.25	20	6.1	771.763	3	40.32	57	76			PEAKS DB
	K.IPAVFKIDALNENK.V	59.41	1570.87	14	-2	786.442	2	33.56	94	107			PEAKS DB
	K.IDALNENK.V	52.84	915.466	8	3.1	916.476	1	19.94	100	107			PEAKS DB
	K.IDALNENKVLVLDTDYK.K	48.68	1962.03	17	1.8	655.019	3	33.03	100	116			PEAKS DB
	K.IDALNENKVLVLDTDYKK.Y	43.94	2090.13	18	6.2	697.72	3	30.67	100	117			PEAKS DB
	I.DALNENK.V	42.38	802.382	7	1.7	803.391	1	19.93	101	107			PEAKS DB
	K.VLVLDTDYK.K	63.48	1064.58	9	2.9	1065.59	1	28.53	108	116			PEAKS DB
	K.VLVLD(+21.98)TDYKK.Y	48.29	1214.65	10	3.5	608.336	2	25.26	108	117	Sodium adduct	D5:Sodium adduct:8.22	PEAKS PTM
	K.VLVLDTD(+21.98)YKK.Y	41.41	1214.65	10	3.5	608.336	2	25.27	108	117	Sodium adduct	D7:Sodium adduct:0.00	PEAKS PTM
	V.LVLDTDYKK.Y	44.17	1093.6	9	1	547.809	2	25.22	109	117			PEAKS DB
	L.VLDTDYK.K	61.04	852.423	7	0.8	853.431	1	28.91	110	116			PEAKS DB
	V.LDTDYKK.Y	51.28	881.449	7	-2.8	882.454	1	25.24	111	117			PEAKS DB
	R.TPEVDDEALEKFDK.A	76.21	1634.77	14	5.9	818.396	2	28.03	141	154			PEAKS DB
	R.TPEVDDEALEK.F	75.42	1244.58	11	1.2	623.297	2	23.22	141	151			PEAKS DB
	R.TPEVD(+21.98)DEALEKFDK.A	64.21	1656.75	14	5.7	829.387	2	28.53	141	154	Sodium adduct	D5:Sodium adduct:7.21	PEAKS PTM
	R.TPEVDDEALE(+21.98)KFDK.A	49.54	1656.75	14	5.7	829.387	2	28.52	141	154	Sodium adduct	E10:Sodium adduct:0.00	PEAKS PTM
	T.PEVDDEALEKFDK.A	87.72	1533.72	13	7.7	512.251	3	28.51	142	154			PEAKS DB
	P.E(-18.01)VDDEALEKFDK.A	68.51	1418.66	12	0.4	710.336	2	28.11	143	154	Pyro-glu from E	E1:Pyro-glu from E:1000.00	PEAKS PTM
	P.EVDDEALEKFDK.A	68.28	1436.67	12	7.6	719.346	2	28.5	143	154			PEAKS DB
	E.VDDEALEKFDK.A	39.27	1307.62	11	3.4	654.822	2	28.13	144	154			PEAKS DB
	K.ALPMHIR.L	37.24	836.469	7	2	837.478	1	23.64	158	164			PEAKS DB
P02668|CASK_BOVIN	A.Q(-17.03)EQNQEQPIR.C	44.99	1251.58	10	-3.4	626.797	2	20.61	22	31	Pyro-glu from Q	Q1:Pyro-glu from Q:1000.00	PEAKS PTM
	R.FFSDKIAKYIPIQYVLSR.Y	37.38	2187.21	18	-0.2	730.077	3	42.03	38	55			PEAKS DB
	K.IAKYIPIQYVLSR.Y	61.6	1562.92	13	-0.1	782.466	2	35.99	43	55			PEAKS DB
	I.PIQYVLSR.Y	50.84	974.555	8	1.2	975.563	1	38.28	48	55			PEAKS DB
	R.YPSYGLNYYQQKPVALINNQFLPYPYYAKPAAVR.S	61.55	4009.06	34	3.8	1003.28	4	40.99	56	89			PEAKS DB
	R.YPSYGLN.Y	49.11	812.37	7	2.5	813.38	1	26.85	56	62			PEAKS DB
	P.SYGLNYYQQKPVALINNQFLPYPYYAKPAAVR.S	41.38	3748.94	32	7.1	938.249	4	40.18	58	89			PEAKS DB
	N.YYQQKPVALINNQFLPYPYYAKPA.A	48.58	2888.49	24	8.5	963.846	3	39.17	63	86			PEAKS DB
	N.YYQQKPVALINNQFLPYPYYAK(+156.12)PAAV.R	46.61	3214.71	26	8.5	804.692	4	37.88	63	88	4-hydroxynonenal (HNE)	K22:4-hydroxynonenal (HNE):90.25	PEAKS PTM
	K.PVALINNQFLPYPYYAKPAAVR.S	56.45	2504.36	22	7.6	835.8	3	39.58	68	89			PEAKS DB
	K.PVALINNQFLPYPYYAK(+156.12)PAAV.R	52.5	2504.37	21	8.4	835.805	3	39.19	68	88	4-hydroxynonenal (HNE)	K17:4-hydroxynonenal (HNE):1000.00	PEAKS PTM
	R.SPAQILQWQVLSNTVPAK.S	96.47	1979.08	18	5.7	990.555	2	40.28	90	107			PEAKS DB
	R.SPAQILQWQVLS(-18.01)NT.V	45.17	1565.82	14	4	783.92	2	39.89	90	103	Dehydration	S12:Dehydration:4.64	PEAKS PTM
	R.SPAQILQWQVLSNTVPAKSC(+119.00)QAQPTTMAR.H	44.13	3272.61	29	7.6	819.166	4	37.54	90	118	Cysteinylation	C20:Cysteinylation:1000.00	PEAKS PTM
	R.SPAQILQWQVL(+21.98).S	40.67	1303.69	11	7.9	652.857	2	44.68	90	100	Sodium adduct	L11:Sodium adduct:1000.00	PEAKS PTM
	R.SPAQILQ.W	40.21	755.418	7	-3	756.423	1	24.99	90	96			PEAKS DB
	R.HPHPHLSFMAIPPK.K	48.89	1607.84	14	8.3	536.958	3	27.41	119	132			PEAKS DB
	R.HPHPHLS(-18.01)FMA.I	41.71	1154.54	10	0.1	578.279	2	26.67	119	128	Dehydration	S7:Dehydration:1000.00	PEAKS PTM
	R.HPHPHLS(-18.01)F.M	36.35	952.467	8	3.3	477.242	2	25.17	119	126	Dehydration	S7:Dehydration:1000.00	PEAKS PTM
	R.HPHPHLS(+126.10)FMAIPPKK.N	35.77	1862.04	15	-1.8	466.516	4	26.16	119	133	Octanoyl	S7:Octanoyl:1000.00	PEAKS PTM
P80195|GLCM1_BOVIN	A.ILNKPEDETHLEAQPTD(-18.01)ASAQFIR.N	79.34	2704.35	24	7.4	677.099	4	28.43	19	42	Dehydration	D17:Dehydration:17.01	PEAKS PTM
	A.ILNKPEDETHLEAQPTDASAQFIR.N	70.85	2722.36	24	5.3	908.464	3	28.81	19	42			PEAKS DB
	A.ILNKPEDETHLEAQ(-18.01).P	64.22	1617.8	14	4.5	809.911	2	28.43	19	32	Dehydration	Q14:Dehydration:56.51	PEAKS PTM
	A.ILNKPEDETHLEAQPT(-18.01)DASAQFIR.N	52.29	2704.35	24	3.2	677.096	4	28.86	19	42	Dehydration	T16:Dehydration:0.00	PEAKS PTM
	R.QPQSQN(-17.03)PKLPLSILKEK.H	50.81	1930.09	17	5.3	644.374	3	31.89	75	91	Ammonia-loss (N)	N6:Ammonia-loss (N):1000.00	PEAKS PTM
	R.QPQSQNPKLPLSILKEK.H	41.69	1947.12	17	8.7	650.051	3	29.2	75	91			PEAKS DB
	R.Q(-17.03)PQSQNPKLPLSILKEK.H	34.71	1930.09	17	-1.1	644.37	3	32.31	75	91	Pyro-glu from Q	Q1:Pyro-glu from Q:1000.00	PEAKS PTM
	K.LPLSILKEK.H	47.95	1039.66	9	6.6	520.843	2	28.38	83	91			PEAKS DB
	L.PLSILKEK.H	39.37	926.58	8	-0.5	464.297	2	28.36	84	91			PEAKS DB
	R.NLENTVKETIK.Y	55.12	1287.7	11	0.5	644.859	2	26	128	138			PEAKS DB
	R.NLENTVKE(+21.98)TIK.Y	34.13	1309.69	11	3.8	655.852	2	25.7	128	138	Sodium adduct	E8:Sodium adduct:0.00	PEAKS PTM
	N.LENTVKETIK.Y	47.57	1173.66	10	2.6	587.839	2	25.65	129	138			PEAKS DB
	L.E(-18.01)NTVKETIK.Y	63.91	1042.57	9	0.6	522.29	2	26.05	130	138	Pyro-glu from E	E1:Pyro-glu from E:1000.00	PEAKS PTM
	L.ENT(-18.01)VKETIK.Y	53.5	1042.57	9	-0.1	522.29	2	25.64	130	138	Dehydration	T3:Dehydration:55.21	PEAKS PTM
	L.ENTVKETIK.Y	48.37	1060.58	9	-1.1	531.295	2	25.59	130	138			PEAKS DB
	E.NTVKETIK.Y	39.1	931.534	8	-8.4	466.77	2	26.06	131	138			PEAKS DB
	K.SLFSHAFEVVKT	68.8	1363.71	12	2.2	682.866	2	34.39	142	153			PEAKS DB
	K.SLFSHAFE(+21.98)VVKT	67.81	1385.7	12	1	693.856	2	34.89	142	153	Sodium adduct	E8:Sodium adduct:54.08	PEAKS PTM
	L.FSHAFEVVKT	48.01	1163.6	10	3	582.808	2	34.39	144	153			PEAKS DB
	F.SHAFEVVKT	66.55	1016.53	9	-1.9	509.271	2	34.89	145	153			PEAKS DB
P10790|FABPH_BOVIN	K.LGVEFDETTADDR.K	67.53	1466.65	13	-3.1	734.331	2	28.06	67	79			PEAKS DB
P80457|XDH_BOVIN	K.IPAFGSIPTEFR.V	60.48	1333.7	12	0.2	667.859	2	37.21	1229	1240			PEAKS DB
Q95JH2|PLCA_BOVIN	I.KYLYGIRVEVR.G	36.21	1394.8	11	-7.6	698.404	2	38.81	77	87			PEAKS DB

## Sheet: Intestinal
Uniprot access number | protein acronym	Amino acid sequences of identified peptides	Peaks Studio score (-10log P)	Theoretical monoisotopic mass (Da)	Length	ppm	m/z	z	Retention time	Start	End	Post-translational modifications	AScore	Found By
P02666|CASB_BOVIN	E.LNVPGEIVES(+79.97)L.S	54.57	1248.6	11	-3.9	1249.6	1	20.98	21	31	Phosphorylation (STY)	S10:Phosphorylation (STY):1000.00	PEAKS PTM
	L.NVPGEIVES(+79.97)L.S	57.86	1135.52	10	6.8	1136.53	1	18.66	22	31	Phosphorylation (STY)	S9:Phosphorylation (STY):1000.00	PEAKS PTM
	V.PGEIVES(+79.97)L.S	51.5	922.405	8	2.6	923.415	1	21	24	31	Phosphorylation (STY)	S7:Phosphorylation (STY):1000.00	PEAKS PTM
	K.FQS(+79.97)EEQQQ.T	59.92	1102.4	8	0.6	1103.4	1	9.44	48	55	Phosphorylation (STY)	S3:Phosphorylation (STY):1000.00	PEAKS PTM
	K.FQS(+79.97)EEQQQTEDELQDK.I	55.71	2060.82	16	3.8	1031.42	2	13.5	48	63	Phosphorylation (STY)	S3:Phosphorylation (STY):42.22	PEAKS PTM
	K.FQS(+79.97)EEQQ.Q	55.04	974.338	7	0.9	975.346	1	9.21	48	54	Phosphorylation (STY)	S3:Phosphorylation (STY):1000.00	PEAKS PTM
	K.FQS(-18.01)EEQQ.Q	47.51	876.361	7	7.9	877.375	1	9.25	48	54	Dehydration	S3:Dehydration:59.24	PEAKS PTM
	K.FQS(+79.96)EEQQQTEDELQDK.I	37.44	2060.81	16	8.5	1031.42	2	13.53	48	63	Sulfation	S3:Sulfation:22.09	PEAKS PTM
	Q.TEDELQDK.I	41.55	976.435	8	5.7	977.448	1	8.98	56	63			PEAKS DB
	Q.SLVYPFPGPIPN.S	65.07	1299.69	12	0.4	1300.69	1	22.53	72	83			PEAKS DB
	Q.SLVYPFPGPI.P	53.75	1088.59	10	1.6	1089.6	1	24.08	72	81			PEAKS DB
	Q.SLVYPFPGPIPN(+21.98).S	46.24	1321.67	12	-5.4	661.838	2	22.49	72	83	Sodium adduct	N12:Sodium adduct:1000.00	PEAKS PTM
	S.LVYPFPGPIPN.S	62.56	1212.65	11	3.4	1213.67	1	22.07	73	83			PEAKS DB
	S.LVYPFPGPI.P	54.01	1001.56	9	-3.2	1002.56	1	23.61	73	81			PEAKS DB
	S.LVYPFPGPIPN(+.98)SLPQ.N	47.42	1638.87	15	-4.5	820.437	2	23.35	73	87	Deamidation (NQ)	N11:Deamidation (NQ):42.68	PEAKS PTM
	L.VYPFPGPIPNS(+14.02).L	58.69	1200.62	11	7	1201.63	1	20.42	74	84	Methylation(others)	S11:Methylation(others):1000.00	PEAKS PTM
	L.VYPFPGPIPNS.L	57.9	1186.6	11	-0.8	1187.61	1	19.89	74	84			PEAKS DB
	L.VYPFPGPIPN.S	57.09	1099.57	10	7.6	1100.59	1	20.21	74	83			PEAKS DB
	L.VYPFPGPI.P	47.81	888.475	8	7.5	889.488	1	22.23	74	81			PEAKS DB
	L.VYPFPGPIPNS(-18.01).L	41.4	1168.59	11	-1.6	585.302	2	19.86	74	84	Dehydration	S11:Dehydration:54.99	PEAKS PTM
	L.VYPFPGPIPN(+.98)SLPQ.N	40.64	1525.78	14	6.4	763.903	2	21.98	74	87	Deamidation (NQ)	N10:Deamidation (NQ):42.68	PEAKS PTM
	V.YPFPGPI.P	38.05	789.406	7	4.5	790.417	1	21.8	75	81			PEAKS DB
	Y.PFPGPIPN.S	45.84	837.438	8	-2.9	838.443	1	20.29	76	83			PEAKS DB
	N.SLPQNIPPLTQT.P	58.03	1307.71	12	4.1	1308.72	1	17.47	84	95			PEAKS DB
	N.SLPQNIPPLTQTPVVVPPFLQPEV.M	56.5	2609.45	24	-1.8	1305.73	2	24.67	84	107			PEAKS DB
	N.SLPQNIPPLTQTPV.V	55	1503.83	14	-0.3	1504.84	1	19.61	84	97			PEAKS DB
	N.SLPQNIPPLTQTPVVVPPFLQPEV(+21.98).M	41.79	2631.43	24	-3.7	1316.72	2	24.68	84	107	Sodium adduct	V24:Sodium adduct:0.00	PEAKS PTM
	N.SLPQNIPPLTQTPV(+21.98).V	41.21	1525.81	14	1.3	1526.82	1	19.68	84	97	Sodium adduct	V14:Sodium adduct:1000.00	PEAKS PTM
	L.PQNIPPLTQTPV(+21.98).V	39.81	1325.7	12	-1.1	663.854	2	19.67	86	97	Sodium adduct	V12:Sodium adduct:1000.00	PEAKS PTM
	Q.NIPPLTQTPVVVPPFLQPE(+21.98)V.M	62.91	2206.2	20	3.8	1104.11	2	24.69	88	107	Sodium adduct	E19:Sodium adduct:0.00	PEAKS PTM
	Q.NIPPLTQTPVVVPPFLQPEV.M	53.94	2184.22	20	4.4	1093.12	2	24.67	88	107			PEAKS DB
	Q.NIPPLT(-18.01)QTPV.V	50.44	1060.59	10	-4.3	531.301	2	17.36	88	97	Dehydration	T6:Dehydration:0.00	PEAKS PTM
	Q.NIPPLTQTPV.V	46.24	1078.6	10	3.3	1079.61	1	17.32	88	97			PEAKS DB
	Q.NIPPLTQTPVVVPPFLQPE.V	43.37	2085.15	19	4.4	1043.59	2	24.62	88	106			PEAKS DB
	Q.NIPPLTQT(-18.01)PV.V	38.24	1060.59	10	-2.2	531.302	2	17.36	88	97	Dehydration	T8:Dehydration:0.00	PEAKS PTM
	Q.NIPPLTQT.P	38.13	882.481	8	2.1	883.49	1	14.52	88	95			PEAKS DB
	I.PPLTQT(-18.01)PV.V	55.05	833.465	8	-4.7	834.468	1	17.43	90	97	Dehydration	T6:Dehydration:28.86	PEAKS PTM
	L.TQT(-18.01)PVVVPPFLQPEV.M	48.08	1631.89	15	-2.9	816.951	2	24.28	93	107	Dehydration	T3:Dehydration:5.03	PEAKS PTM
	L.TQTPVVVPPFLQPE(+21.98)V.M	38.61	1671.88	15	3.3	836.952	2	24.26	93	107	Sodium adduct	E14:Sodium adduct:0.00	PEAKS PTM
	T.PVVVPPFLQ(+.98)PEV.M	70.06	1320.73	12	0.6	1321.74	1	24.46	96	107	Deamidation (NQ)	Q9:Deamidation (NQ):1000.00	PEAKS PTM
	T.PVVVPPFLQPEV.M	55.45	1319.75	12	5.3	1320.76	1	24.42	96	107			PEAKS DB
	T.PVVVPPFLQPE.V	51	1220.68	11	1.4	1221.69	1	22.95	96	106			PEAKS DB
	T.PVVVPPFLQ(-18.01).P	50.67	976.574	9	-0.5	977.581	1	24.42	96	104	Dehydration	Q9:Dehydration:1000.00	PEAKS PTM
	T.PVVVPPFLQPEV(+21.98).M	43.93	1341.73	12	-2	671.871	2	24.32	96	107	Sodium adduct	V12:Sodium adduct:0.00	PEAKS PTM
	T.PVVVPPFLQPEVM(+15.99).G	41.63	1466.78	13	-6.6	734.395	2	23.59	96	108	Oxidation (M)	M13:Oxidation (M):1000.00	PEAKS DB
	T.PVVVPPFLQPE(+21.98)V.M	40.56	1341.73	12	-4.7	671.87	2	24.34	96	107	Sodium adduct	E11:Sodium adduct:14.02	PEAKS PTM
	T.PVVVPPFLQPE(+21.98).V	38.74	1242.66	11	-7.1	622.334	2	22.88	96	106	Sodium adduct	E11:Sodium adduct:1000.00	PEAKS PTM
	P.VVVPPFLQPEV(+21.98).M	44.97	1244.68	11	-0.1	623.346	2	23.8	97	107	Sodium adduct	V11:Sodium adduct:0.00	PEAKS PTM
	P.VVVPPFLQPEV.M	41.53	1222.7	11	2.3	1223.71	1	23.83	97	107			PEAKS DB
	V.VVPPFLQ(-18.01).P	43.69	780.453	7	-1.8	781.459	1	20.12	98	104	Dehydration	Q7:Dehydration:1000.00	PEAKS PTM
	V.VVPPFLQPE(+21.98)V.M	43.05	1145.61	10	2.1	1146.62	1	22.06	98	107	Sodium adduct	E9:Sodium adduct:14.02	PEAKS PTM
	V.VVPPFLQPEV.M	38.95	1123.63	10	1.8	1124.64	1	22	98	107			PEAKS DB
	V.VVPPFLQPEV(+21.98).M	37.9	1145.61	10	-1.4	573.811	2	22.05	98	107	Sodium adduct	V10:Sodium adduct:0.00	PEAKS PTM
	V.PPFLQPEV.M	37.44	925.491	8	1.6	926.5	1	22.05	100	107			PEAKS DB
	P.K(-15.01)YPVEPF.T	38.31	863.443	7	-0.7	864.449	1	20.45	128	134	ISD (z+2)-series	K1:ISD (z+2)-series:1000.00	PEAKS PTM
	L.TLTDVEN.L	37.81	790.371	7	-8.2	791.372	1	11.37	141	147			PEAKS DB
	L.TDVEN(+.98)LHLPLPL.L	55.98	1360.72	12	-2.3	681.368	2	23.57	143	154	Deamidation (NQ)	N5:Deamidation (NQ):1000.00	PEAKS PTM
	T.DVEN(+.98)LHLPLPL.L	40.87	1259.68	11	0.1	630.845	2	24.17	144	154	Deamidation (NQ)	N4:Deamidation (NQ):1000.00	PEAKS PTM
	W.MHQPHQPLPPT.V	49.12	1281.63	11	3.3	1282.64	1	11.13	159	169			PEAKS DB
	M.HQPHQPLPPT.V	55.55	1150.59	10	9.4	1151.61	1	10.01	160	169			PEAKS DB
	V.MFPPQSV.L	39.44	804.384	7	2.2	805.393	1	16.26	171	177			PEAKS DB
	Q.K(-15.01)AVPYPQ.R	39.52	786.428	7	0.5	787.435	1	15.74	191	197	ISD (z+2)-series	K1:ISD (z+2)-series:1000.00	PEAKS PTM
	L.YQEPVLGPV.R	42.23	1000.52	9	4.1	1001.53	1	17.75	208	216			PEAKS DB
	L.YQE(+21.98)PVLGPV.R	41.74	1022.5	9	1.1	1023.51	1	17.76	208	216	Sodium adduct	E3:Sodium adduct:34.33	PEAKS PTM
	L.YQEPVLG.P	40.3	804.402	7	7.6	805.415	1	14.62	208	214			PEAKS DB
	Y.Q(-17.03)EPVLGPV.R	58.32	820.433	8	-2.2	821.438	1	19.55	209	216	Pyro-glu from Q	Q1:Pyro-glu from Q:1000.00	PEAKS PTM
	Y.Q(+164.06)EPVLGPV.R	50.69	1001.52	8	9.3	1002.54	1	17.77	209	216	O-Diisopropylphosphorylation	Q1:O-Diisopropylphosphorylation:1000.00	PEAKS PTM
	Y.QEPVLGPV.R	43.56	837.46	8	2.5	838.469	1	16.28	209	216			PEAKS DB
	Q.EPVLGPV.R	40.11	709.401	7	-2.3	710.407	1	17.84	210	216			PEAKS PTM
P02662|CASA1_BOVIN	K.HQGLPQE.V	40.62	807.388	7	-3	808.392	1	10.07	23	29			PEAKS DB
	N.LLR(+80.99)FFVAPFPEV.F	44.9	1514.79	12	9.6	1515.81	1	18.6	35	46	Arginine replacement by Nitropyrimidyl ornithine	R3:Arginine replacement by Nitropyrimidyl ornithine:1000.00	PEAKS PTM
	F.FVAPFPEVFG.K	60.46	1108.56	10	3.6	1109.57	1	24.57	39	48			PEAKS DB
	F.FVAPFPE(+21.98)VFG.K	51.61	1130.54	10	4	1131.55	1	24.59	39	48	Sodium adduct	E7:Sodium adduct:20.50	PEAKS PTM
	F.VAPFPEVFG.K	53.55	961.491	9	7.5	962.505	1	22.17	40	48			PEAKS DB
	F.V(+71.04)APFPEV.F	42.27	828.438	7	-6.5	829.44	1	18.94	40	46	Propionamide (K X@N-term)	V1:Propionamide (K X@N-term):1000.00	PEAKS PTM
	V.APFPEVFG.K	41.25	862.423	8	8.1	863.437	1	21.09	41	48			PEAKS DB
	A.PFPEVFG.K	39.46	791.385	7	5.3	792.397	1	22.2	42	48			PEAKS DB
	K.DIGS(+79.97)ES(+79.97)TEDQ.A	38.08	1239.36	10	9.7	1240.38	1	20.52	58	67	Phosphorylation (STY)	S4:Phosphorylation (STY):0.00;S6:Phosphorylation (STY):0.00	PEAKS PTM
	Q.KEDVPSE.R	37.63	802.371	7	7.3	803.384	1	8.64	98	104			PEAKS DB
	R.YLGYLEQ.L	39.8	884.428	7	3.9	885.439	1	16.73	106	112			PEAKS DB
	R.YLGYLEQL.L	39.11	997.512	8	2.2	998.521	1	21.47	106	113			PEAKS DB
	K.VPQLEIVPNS(+79.97)AEER.L	74.67	1659.79	14	-0.2	830.9	2	16.94	121	134	Phosphorylation (STY)	S10:Phosphorylation (STY):1000.00	PEAKS PTM
	K.VPQLE(+21.98)IVPN.S	48.76	1029.55	9	1	1030.56	1	18.02	121	129	Sodium adduct	E5:Sodium adduct:22.05	PEAKS PTM
	K.VPQLEIVPN(+.98)S(+79.97)AEER.L	47.86	1660.77	14	-1.6	831.391	2	17.42	121	134	Deamidation (NQ); Phosphorylation (STY)	N9:Deamidation (NQ):25.95;S10:Phosphorylation (STY):1000.00	PEAKS PTM
	K.VPQLEIVPN.S	40.53	1007.57	9	2	1008.57	1	18.01	121	129			PEAKS DB
	K.VPQLE(+21.98)IV.P	37.97	818.451	7	-1.9	819.457	1	19.16	121	127	Sodium adduct	E5:Sodium adduct:30.83	PEAKS PTM
	V.PQLEIVPNS(+79.97)AEER.L	72.56	1560.72	13	-4.2	781.363	2	16.97	122	134	Phosphorylation (STY)	S9:Phosphorylation (STY):1000.00	PEAKS PTM
	P.Q(-17.03)LEIVPN.S	44.01	794.417	7	4.4	795.428	1	19.74	123	129	Pyro-glu from Q	Q1:Pyro-glu from Q:1000.00	PEAKS PTM
	Q.LEIVPNS(+79.97)AEE.R	62.91	1179.51	10	1.1	1180.51	1	15.95	124	133	Phosphorylation (STY)	S7:Phosphorylation (STY):1000.00	PEAKS PTM
	L.EIVPNS(+79.97)AEER.L	64.4	1222.52	10	1.7	1223.53	1	11.89	125	134	Phosphorylation (STY)	S6:Phosphorylation (STY):1000.00	PEAKS PTM
	L.EIVPNS(+79.97)AEE.R	54	1066.42	9	3.6	1067.43	1	12.76	125	133	Phosphorylation (STY)	S6:Phosphorylation (STY):1000.00	PEAKS PTM
	V.PNS(+79.97)AEER.L	71.07	881.328	7	-0.6	882.335	1	11.88	128	134	Phosphorylation (STY)	S3:Phosphorylation (STY):1000.00	PEAKS PTM
	V.PNS(-18.01)AEER.L	60.73	783.351	7	-0.8	784.358	1	11.89	128	134	Dehydration	S3:Dehydration:1000.00	PEAKS PTM
	V.PN(+.98)S(+79.97)AEER.L	53.21	882.312	7	7.3	883.326	1	12.28	128	134	Deamidation (NQ); Phosphorylation (STY)	N2:Deamidation (NQ):1000.00;S3:Phosphorylation (STY):1000.00	PEAKS PTM
	V.PN(-17.03)SAEER.L	48.57	784.335	7	6	785.347	1	12.28	128	134	Ammonia-loss (N)	N2:Ammonia-loss (N):1000.00	PEAKS PTM
	Q.Q(-17.03)KEPMIGV.N	53.54	883.447	8	-0.8	884.454	1	16.4	146	153	Pyro-glu from Q	Q1:Pyro-glu from Q:1000.00	PEAKS PTM
	Y.Q(-17.03)LDAYPS.G	47.93	775.339	7	-1	776.345	1	16.13	170	176	Pyro-glu from Q	Q1:Pyro-glu from Q:1000.00	PEAKS PTM
	S.FSDIPNPI.G	37.94	901.455	8	0.7	902.462	1	18.56	194	201			PEAKS DB
	F.SDIPNPIG(+14.02).S	38.77	825.423	8	-1.6	826.429	1	15.67	195	202	Methylation(C-term)	G8:Methylation(C-term):1000.00	PEAKS PTM
	I.GSE(+21.98)NSEK.T	37.69	771.301	7	-9.5	772.301	1	1.45	202	208	Sodium adduct	E3:Sodium adduct:22.69	PEAKS PTM
P02663|CASA2_BOVIN	K.NMAINPS(+79.97)KEN.L	64.67	1196.49	10	0	599.252	2	11.56	40	49	Phosphorylation (STY)	S7:Phosphorylation (STY):1000.00	PEAKS PTM
	K.NMAIN(+.98)PS.K	37.71	746.327	7	3.5	747.337	1	12.98	40	46	Deamidation (NQ)	N5:Deamidation (NQ):10.66	PEAKS PTM
	M.AINPS(+79.97)KEN.L	57.34	951.406	8	3.1	952.416	1	8.07	42	49	Phosphorylation (STY)	S5:Phosphorylation (STY):1000.00	PEAKS PTM
	V.KITVDDK.H	38.48	817.455	7	2.7	818.464	1	7.83	85	91			PEAKS DB
	Y.LYQGPIV.L	39.75	788.443	7	-5	789.447	1	16.96	114	120			PEAKS DB
	Y.QGPIVLNPWD(+21.98)QV.K	40.28	1386.69	12	-3.4	694.35	2	22.66	116	127	Sodium adduct	D10:Sodium adduct:8.22	PEAKS PTM
	I.VLNPWDQV.K	45.68	969.492	8	5.1	970.504	1	19.73	120	127			PEAKS DB
	I.VLNPWDQ.V	42.24	870.424	7	1	871.432	1	17.02	120	126			PEAKS DB
	R.N(+.98)AVPITPT.L	37.6	812.428	8	7.9	813.442	1	14.26	130	137	Deamidation (NQ)	N1:Deamidation (NQ):1000.00	PEAKS PTM
	L.STS(+79.97)EENS.K	39.82	832.249	7	-4.8	833.252	1	3.88	144	150	Phosphorylation (STY)	S3:Phosphorylation (STY):0.00	PEAKS PTM
	K.KTVDMEST(+79.97)EV.F	42.12	1217.49	10	-0.7	609.751	2	13.03	152	161	Phosphorylation (STY)	T8:Phosphorylation (STY):0.00	PEAKS PTM
	K.TVDMES(+79.97)TEV.F	67.86	1089.39	9	2.6	1090.4	1	14.11	153	161	Phosphorylation (STY)	S6:Phosphorylation (STY):0.00	PEAKS PTM
	K.TVDM(+15.99)ES(+79.97)TEV.F	42.73	1105.39	9	-1.9	1106.39	1	11.7	153	161	Oxidation (M); Phosphorylation (STY)	M4:Oxidation (M):1000.00;S6:Phosphorylation (STY):0.00	PEAKS PTM
	K.TVDM(+15.99)EST(+79.97)EV.F	37.75	1105.39	9	-2.8	1106.39	1	11.71	153	161	Oxidation (M); Phosphorylation (STY)	M4:Oxidation (M):1000.00;T7:Phosphorylation (STY):8.69	PEAKS PTM
	T.VDMES(+79.97)TEV.F	54.84	988.346	8	2.4	989.356	1	14.04	154	161	Phosphorylation (STY)	S5:Phosphorylation (STY):0.00	PEAKS PTM
	V.DMES(+79.97)TEV.F	42.93	889.278	7	4	890.288	1	12.92	155	161	Phosphorylation (STY)	S4:Phosphorylation (STY):0.00	PEAKS PTM
P02668|CASK_BOVIN	A.Q(-17.03)EQNQEQPI.R	66.06	1095.48	9	2.1	1096.49	1	13.18	22	30	Pyro-glu from Q	Q1:Pyro-glu from Q:1000.00	PEAKS PTM
	K.NQDKTEIPT.I	42.05	1044.51	9	-0.7	1045.52	1	11.08	134	142			PEAKS DB
	K.TEIPTINT.I	39.84	887.46	8	-3.3	888.464	1	15.33	138	145			PEAKS DB
	N.TIAS(+79.97)GEPT.S	53.05	854.342	8	-5.1	855.345	1	11.56	145	152	Phosphorylation (STY)	S4:Phosphorylation (STY):22.45	PEAKS PTM
	T.IAS(+79.97)GEPT.S	46.23	753.295	7	-0.4	754.302	1	10.5	146	152	Phosphorylation (STY)	S3:Phosphorylation (STY):25.70	PEAKS PTM
	T.IASGEPT.S	39.24	673.328	7	4.8	674.339	1	8.96	146	152			PEAKS PTM
	V.ATLEDS(+79.97)PEV.I	64.96	1039.41	9	4.5	1040.42	1	13.79	165	173	Phosphorylation (STY)	S6:Phosphorylation (STY):43.86	PEAKS PTM
	A.TLEDS(+79.97)PEV.I	52.28	968.374	8	8.2	969.389	1	13.51	166	173	Phosphorylation (STY)	S5:Phosphorylation (STY):55.36	PEAKS PTM
	T.LEDS(+79.97)PEV.I	55.47	867.326	7	6.2	868.339	1	12.85	167	173	Phosphorylation (STY)	S4:Phosphorylation (STY):1000.00	PEAKS PTM
	I.ESP(-30.01)PEINT.V	51.69	855.397	8	7	856.411	1	12.81	175	182	Proline oxidation to pyrrolidinone	P3:Proline oxidation to pyrrolidinone:24.44	PEAKS PTM
	I.ESPPEINT.V	43.86	885.408	8	5.4	886.42	1	12.42	175	182			PEAKS DB
	I.ESPPEIN.T	37.73	784.36	7	-2.8	785.365	1	11.74	175	181			PEAKS DB
P02754|LACB_BOVIN	R.TPEVDDE.A	42.36	803.318	7	9.1	804.333	1	10.21	141	147			PEAKS DB
	R.TPEVDDEA.L	49.34	874.356	8	0.1	875.363	1	11.02	141	148			PEAKS DB
	R.TPEVDD(-18.01)E.A	47.78	785.308	7	-4.4	786.312	1	11.03	141	147	Dehydration	D6:Dehydration:24.44	PEAKS PTM
	Y.VEELKPTPE.G	46.24	1040.54	9	0.2	1041.55	1	11.63	59	67			PEAKS DB
	Y.VEELKPTPEGDLE.I	41.21	1454.71	13	1.7	728.365	2	13.95	59	71			PEAKS DB
	R.TPEVDDEALE.K	53.83	1116.48	10	0.8	1117.49	1	14.06	141	150			PEAKS DB
	Y.VEELKPTPEGDL.E	54.32	1325.67	12	5.6	663.847	2	14.48	59	70			PEAKS DB
	V.YVEELKPTPEGDLE.I	45.68	1617.78	14	7.8	809.902	2	15.07	58	71			PEAKS DB
P00792|PEPA_BOVIN	V.FDNIWDQG.L	40.61	993.419	8	6.2	994.433	1	18.42	183	190			PEAKS DB
	Y.S(+14.02)GSLNWVPV.S	39.19	971.508	9	0.7	972.516	1	20.83	222	230	Methylation(others)	S1:Methylation(others):7.32	PEAKS PTM
	S.SIDSLPD(-18.01)I.V	45.56	840.423	8	1.4	841.431	1	20.73	297	304	Dehydration	D7:Dehydration:33.26	PEAKS PTM
	S.SIDSLPDIV.F	43.2	957.502	9	1.3	958.51	1	20.66	297	305			PEAKS DB
P00711|LALBA_BOVIN	Y.GGVSLPEWV.C	41.76	942.481	9	6.5	943.495	1	22.12	38	46			PEAKS DB
	K.FLDDDLTDDIM.C	43.17	1311.55	11	3.2	1312.57	1	22.5	99	109			PEAKS DB
	K.FLDDDLTDDI.M	40.57	1180.51	10	9	1181.53	1	20.93	99	108			PEAKS DB
P00760|TRY1_BOVIN	K.NKPGVYT.K	40.47	777.402	7	0.8	778.41	1	9.27	224	230			PEAKS DB
	R.NKPGVYT.R	40.47	777.402	7	0.8	778.41	1	9.27	834	840			PEAKS DB

## Sheet: ApicalCompartment_N1
Uniprot access number | protein acronym	Amino acid sequences of identified peptides	Peaks Studio score (-10log P)	Theoretical monoisotopic mass (Da)	Length	ppm	m/z	z	Retention time	Start	End	Post-translational modifications	AScore	Found By
P02666|CASB_BOVIN	K.FQS(+79.97)EEQQQTEDELQDK.I	69.3	2060.82	16	5.4	1031.42	2	24.86	48	63	Phosphorylation (STY)	S3:Phosphorylation (STY):87.12	PEAKS PTM
	K.FQS(+79.97)EEQQQTEDELQD.K	63.25	1932.73	15	2	967.372	2	25.29	48	62	Phosphorylation (STY)	S3:Phosphorylation (STY):41.24	PEAKS PTM
	K.FQS(+79.97)EEQQQTEDEL.Q	57.29	1689.64	13	4.7	1690.66	1	26.51	48	60	Phosphorylation (STY)	S3:Phosphorylation (STY):66.36	PEAKS PTM
	K.FQS(+79.97)EEQQQ.T	55.52	1102.4	8	5	1103.41	1	16.73	48	55	Phosphorylation (STY)	S3:Phosphorylation (STY):1000.00	PEAKS PTM
	K.FQS(+79.97)EEQQ.Q	50.29	974.338	7	4.1	975.35	1	16.35	48	54	Phosphorylation (STY)	S3:Phosphorylation (STY):1000.00	PEAKS PTM
	Q.Q(-17.03)QTEDEL.Q	43.66	844.345	7	2.1	845.354	1	24.3	54	60	Pyro-glu from Q	Q1:Pyro-glu from Q:1000.00	PEAKS PTM
	Q.QQTEDELQDK.I	41.53	1232.55	10	1.7	617.284	2	18.05	54	63			PEAKS DB
	Q.QQTEDEL.Q	33.2	861.372	7	5.9	862.384	1	21.17	54	60			PEAKS DB
	Q.QT(-18.01)EDELQDK.I	58.37	1086.48	9	4.1	544.251	2	17.44	55	63	Dehydration	T2:Dehydration:36.80	PEAKS PTM
	Q.TEDELQDK.I	47.78	976.435	8	7.9	977.45	1	16.52	56	63			PEAKS DB
	Q.TEDELQD.K	35.08	848.34	7	1.6	849.349	1	19.11	56	62			PEAKS DB
	Q.SLVYPFPGPI.P	53.98	1088.59	10	3.9	1089.6	1	43.99	72	81			PEAKS DB
	S.LVYPFPGPIPN.S	67.05	1212.65	11	9.1	1213.67	1	40.32	73	83			PEAKS DB
	S.LVYPFPGPI.P	56.37	1001.56	9	6.1	1002.57	1	43.15	73	81			PEAKS DB
	S.LVYPFPGPIPN(+21.98).S	40.99	1234.64	11	1.7	618.326	2	40.37	73	83	Sodium adduct	N11:Sodium adduct:1000.00	PEAKS PTM
	L.VYPFPGPIPN.S	61.75	1099.57	10	4.9	1100.58	1	37.19	74	83			PEAKS DB
	L.VYPFPGPIP.N	51.36	985.527	9	-4.2	986.53	1	40.78	74	82			PEAKS DB
	L.VYPFPGPI.P	51.28	888.475	8	4.2	889.486	1	39.94	74	81			PEAKS DB
	L.VYPFPGPIPN(+.98)SLPQ.N	45.67	1525.78	14	-1.9	763.897	2	40.3	74	87	Deamidation (NQ)	N10:Deamidation (NQ):61.69	PEAKS PTM
	L.VYPFPGPI(+21.98).P	33.77	910.456	8	-2	456.235	2	39.99	74	81	Sodium adduct	I8:Sodium adduct:1000.00	PEAKS PTM
	V.YPFPGPIPN.S	49.28	1000.5	9	9.3	1001.52	1	35.23	75	83			PEAKS DB
	V.YPFPGPI.P	42.3	789.406	7	-8.4	790.407	1	39.72	75	81			PEAKS DB
	Y.PFPGPIPN.S	50.23	837.438	8	-0.8	838.445	1	37.18	76	83			PEAKS DB
	P.FPGPIPNS(+43.04).L	33.56	870.46	8	4.9	871.471	1	36.35	77	84	Carboxyl modification with ethanolamine	S8:Carboxyl modification with ethanolamine:1000.00	PEAKS PTM
	N.SLPQNIPPLTQT.P	48.53	1307.71	12	8.1	1308.73	1	32.04	84	95			PEAKS DB
	N.SLPQNIPPLTQTPVVVPPFLQPE(+21.98)V.M	43.15	2631.43	24	9.5	1316.73	2	47.43	84	107	Sodium adduct	E23:Sodium adduct:21.94	PEAKS PTM
	N.SLPQNIPPLTQTPV(+21.98).V	37.72	1525.81	14	3.3	763.916	2	35.92	84	97	Sodium adduct	V14:Sodium adduct:1000.00	PEAKS PTM
	N.SLPQNIPPLTQTPVVVPPFLQ(-18.01).P	37.64	2266.27	21	2.7	1134.15	2	47.43	84	104	Dehydration	Q21:Dehydration:50.04	PEAKS PTM
	N.SLPQNIPPLTQTPVVVPPFLQPEV.M	35.65	2609.45	24	7	870.829	3	47.47	84	107			PEAKS DB
	S.LPQNIPPLT(+87.05)QTPVVVPPFLQPEV.M	49.03	2609.47	23	4.9	1305.75	2	47.43	85	107	Phosphorylation to amine thiol	T9:Phosphorylation to amine thiol:48.87	PEAKS PTM
	L.PQNIPPLTQTPVVVPPFLQPEV.M	59.33	2409.33	22	6.3	1205.68	2	47.32	86	107			PEAKS DB
	L.PQNIPPLTQTPVVVPPFLQPEV(+21.98).M	44.07	2431.31	22	1.5	811.446	3	47.32	86	107	Sodium adduct	V22:Sodium adduct:0.00	PEAKS PTM
	L.PQNIPPLTQTPVVVPPFLQPE(+21.98)V.M	39.72	2431.31	22	7.9	1216.67	2	47.32	86	107	Sodium adduct	E21:Sodium adduct:10.11	PEAKS PTM
	L.PQNIPPLTQTPV(+21.98).V	36.35	1325.7	12	0.3	663.855	2	31.34	86	97	Sodium adduct	V12:Sodium adduct:1000.00	PEAKS PTM
	L.PQNIPPLTQTPV.V	34.4	1303.71	12	6.2	652.868	2	31.36	86	97			PEAKS DB
	Q.NIPPLTQTPV.V	52.9	1078.6	10	5.3	1079.62	1	31.67	88	97			PEAKS DB
	Q.NIPPLTQTPVVVPPFLQPEV.M	52.56	2184.22	20	9.1	1093.13	2	47.43	88	107			PEAKS DB
	Q.NIPPLTQTPVVVPPFLQPE(+21.98)V.M	46.21	2206.2	20	7.6	1104.12	2	47.42	88	107	Sodium adduct	E19:Sodium adduct:11.06	PEAKS PTM
	Q.NIPPLTQT.P	43.23	882.481	8	5.9	883.494	1	26.77	88	95			PEAKS DB
	Q.NIPPLTQTPVVVPPFLQ(-18.01).P	37.44	1841.05	17	6.2	921.535	2	47.43	88	104	Dehydration	Q17:Dehydration:74.48	PEAKS PTM
	Q.NIPPLTQT(-18.01).P	32.22	864.471	8	8	865.485	1	31.66	88	95	Dehydration	T8:Dehydration:12.81	PEAKS PTM
	I.PPLTQTPVVVPPFLQPEV.M	56.52	1957.09	18	7.6	979.561	2	47.43	90	107			PEAKS DB
	I.PPLTQT(-18.01)PV.V	52.25	833.465	8	2.6	834.474	1	31.67	90	97	Dehydration	T6:Dehydration:40.21	PEAKS PTM
	I.PPLTQT(-18.01)PVVV.P	40.86	1031.6	10	2.5	1032.61	1	47.43	90	99	Dehydration	T6:Dehydration:28.16	PEAKS PTM
	I.PPLTQTPV.V	35.27	851.475	8	2.4	852.485	1	35.84	90	97			PEAKS DB
	I.PPLTQTPV(+21.98).V	33.89	873.457	8	-7.4	437.733	2	31.64	90	97	Sodium adduct	V8:Sodium adduct:1000.00	PEAKS PTM
	I.PPLTQT(-18.01)PVV.V	32.34	932.533	9	2	933.542	1	47.43	90	98	Dehydration	T6:Dehydration:32.28	PEAKS PTM
	L.TQTPVVVPPFLQPE(+21.98)V.M	46.11	1671.88	15	6.7	836.955	2	44.59	93	107	Sodium adduct	E14:Sodium adduct:17.01	PEAKS PTM
	L.TQTPVVVPPFLQPEV(+21.98).M	45.9	1671.88	15	0.2	836.95	2	44.57	93	107	Sodium adduct	V15:Sodium adduct:0.00	PEAKS PTM
	T.QTPVVVPPFLQPEV.M	38.09	1548.86	14	0.6	775.435	2	44.49	94	107			PEAKS DB
	Q.TPVVVPPFLQPE(+21.98)V.M	48.14	1442.78	13	3.9	722.399	2	44.63	95	107	Sodium adduct	E12:Sodium adduct:17.01	PEAKS PTM
	Q.TPVVVPPFLQPEV(+21.98).M	46.27	1442.78	13	6.8	722.401	2	44.77	95	107	Sodium adduct	V13:Sodium adduct:0.00	PEAKS PTM
	Q.TPVVVPPFLQPEV.M	34.72	1420.8	13	1.4	711.407	2	44.63	95	107			PEAKS DB
	T.PVVVPPFLQPEV.M	61.88	1319.75	12	9.2	1320.77	1	44.86	96	107			PEAKS DB
	T.PVVVPPFLQPE(+21.98)VMG.V	56.81	1529.79	14	-1.4	765.903	2	46.35	96	109	Sodium adduct	E11:Sodium adduct:19.27	PEAKS PTM
	T.PVVVPPFLQPE(+21.98)V.M	55.36	1341.73	12	2.4	671.874	2	44.89	96	107	Sodium adduct	E11:Sodium adduct:26.02	PEAKS PTM
	T.PVVVPPFLQ(-18.01).P	53.09	976.574	9	5.4	977.587	1	44.86	96	104	Dehydration	Q9:Dehydration:1000.00	PEAKS PTM
	T.PVVVPPFLQPE.V	51.72	1220.68	11	5	1221.69	1	41.93	96	106			PEAKS DB
	T.PVVVPPFLQPEVM(+15.99).G	51.01	1466.78	13	2.6	734.401	2	42.84	96	108	Oxidation (M)	M13:Oxidation (M):1000.00	PEAKS DB
	T.PVVVPPFLQPE(+21.98).V	49.46	1242.66	11	5.2	622.342	2	41.93	96	106	Sodium adduct	E11:Sodium adduct:1000.00	PEAKS PTM
	T.PVVVPPFLQPEVMG.V	44.52	1507.81	14	0.4	754.913	2	46.21	96	109			PEAKS DB
	T.PVVVPPFLQPEV(+21.98).M	44.48	1341.73	12	2.9	671.875	2	44.79	96	107	Sodium adduct	V12:Sodium adduct:0.00	PEAKS PTM
	T.PVVVPPF.L	43.08	753.442	7	4.8	754.453	1	37.43	96	102			PEAKS DB
	T.PVVVPPFLQPE(+37.95).V	36.67	1258.63	11	1.9	630.322	2	41.81	96	106	Replacement of 2 protons by calcium	E11:Replacement of 2 protons by calcium:1000.00	PEAKS PTM
	T.PVVVPPFLQ(+.98)PEV.M	36.26	1320.73	12	8.8	661.38	2	45.66	96	107	Deamidation (NQ)	Q9:Deamidation (NQ):1000.00	PEAKS PTM
	V.VVPPFLQPEV.M	47.61	1123.63	10	6.5	1124.64	1	40.22	98	107			PEAKS DB
	V.VVPPFLQPE.V	36.49	1024.56	9	5.5	1025.57	1	36.5	98	106			PEAKS DB
	V.VVPPFLQPE(+21.98)V.M	34.65	1145.61	10	5.6	1146.62	1	40.14	98	107	Sodium adduct	E9:Sodium adduct:14.02	PEAKS PTM
	V.VPPFLQPEV.M	43.13	1024.56	9	0.3	1025.57	1	38	99	107			PEAKS DB
	V.VPPFLQPE(+21.98)V.M	32.94	1046.54	9	-0.7	1047.55	1	44.79	99	107	Sodium adduct	E8:Sodium adduct:12.28	PEAKS PTM
	V.PPFLQPE(+21.98)V.M	39.62	947.473	8	-1.1	474.743	2	40.14	100	107	Sodium adduct	E7:Sodium adduct:21.94	PEAKS PTM
	V.PPFLQPEV.M	38.8	925.491	8	3.3	926.501	1	44.9	100	107			PEAKS DB
	V.PPFLQPEV(+21.98).M	37.23	947.473	8	-0.1	474.744	2	40.26	100	107	Sodium adduct	V8:Sodium adduct:0.00	PEAKS PTM
	P.PFLQPEV.M	34.86	828.438	7	2.8	829.448	1	44.89	101	107			PEAKS DB
	L.TLTDVEN.L	40.04	790.371	7	9.2	791.385	1	20.57	141	147			PEAKS DB
	W.MHQPHQPLPPT.V	51.41	1281.63	11	5.1	641.825	2	21.1	159	169			PEAKS DB
	W.MHQPHQPLPPT(+21.98).V	35.37	1303.61	11	-0.8	652.812	2	21.12	159	169	Sodium adduct	T11:Sodium adduct:1000.00	PEAKS PTM
	M.HQPHQPLPPT.V	47.7	1150.59	10	3.1	576.303	2	19.01	160	169			PEAKS DB
	V.MFPPQSV.L	40.73	804.384	7	-4.6	805.388	1	29.31	171	177			PEAKS DB
	L.SQSK(+43.99)VLPVPQ.K	39.48	1125.6	10	8.2	1126.62	1	25.5	181	190	Carboxylation (DKW)	K4:Carboxylation (DKW):1000.00	PEAKS PTM
	S.K(+72.02)VLPVPQ.K	37.34	851.512	7	-0.7	852.518	1	34.36	184	190	Carboxyethyl	K1:Carboxyethyl:1000.00	PEAKS PTM
	L.YQEPVLGPV.R	50.69	1000.52	9	6.5	1001.54	1	32.23	208	216			PEAKS DB
	L.YQEPVLG.P	40.07	804.402	7	4.1	805.412	1	26.37	208	214			PEAKS DB
	Y.Q(-17.03)EPVLGPV.R	48.56	820.433	8	1.6	821.442	1	34.27	209	216	Pyro-glu from Q	Q1:Pyro-glu from Q:1000.00	PEAKS PTM
	Y.QEPVLGPV.R	42.65	837.46	8	1.7	838.468	1	29.38	209	216			PEAKS DB
P02662|CASA1_BOVIN	K.HQGLPQE.V	46.86	807.388	7	2.5	808.397	1	18.7	23	29			PEAKS DB
	N.LLR(+80.99)FFVAPFPEV.F	42.21	1514.79	12	0.6	1515.8	1	33.35	35	46	Arginine replacement by Nitropyrimidyl ornithine	R3:Arginine replacement by Nitropyrimidyl ornithine:1000.00	PEAKS PTM
	F.FVAPFPEVFG.K	55.53	1108.56	10	-0.2	1109.57	1	45.65	39	48			PEAKS DB
	F.FVAPFPEV.F	42.65	904.469	8	3.2	905.48	1	39.82	39	46			PEAKS DB
	F.FVAPFPE.V	33.09	805.401	7	2.9	806.411	1	34.3	39	45			PEAKS DB
	F.VAPFPEVFG.K	50.61	961.491	9	6.9	962.505	1	40.43	40	48			PEAKS DB
	F.V(+71.04)APFPEV.F	43.38	828.438	7	-8	829.439	1	34.14	40	46	Propionamide (K X@N-term)	V1:Propionamide (K X@N-term):1000.00	PEAKS PTM
	F.VAPFPEV.F	34.2	757.401	7	4.7	758.412	1	33.46	40	46			PEAKS DB
	A.PFPEVFG.K	36.81	791.385	7	0.7	792.393	1	40.37	42	48			PEAKS DB
	K.EKVNELS(+79.97)K.D	47.9	1025.48	8	-4.5	513.745	2	16.3	50	57	Phosphorylation (STY)	S7:Phosphorylation (STY):1000.00	PEAKS PTM
	K.VNELSKDIGS(+79.97)ES(+79.97)TEDQAMEDIK.Q	32.69	2597.05	22	7.2	866.697	3	31.04	52	73	Phosphorylation (STY)	S10:Phosphorylation (STY):0.00;S12:Phosphorylation (STY):0.00	PEAKS PTM
	K.DIGS(+79.97)EST(+79.97)EDQAMEDIK.Q	59.78	1926.68	16	9.2	964.358	2	29.13	58	73	Phosphorylation (STY)	S4:Phosphorylation (STY):0.00;T7:Phosphorylation (STY):0.00	PEAKS PTM
	K.DIGS(+79.97)ES(+79.97)TEDQAMEDIK.Q	59.47	1926.68	16	5.9	964.355	2	29.15	58	73	Phosphorylation (STY)	S4:Phosphorylation (STY):29.32;S6:Phosphorylation (STY):17.01	PEAKS PTM
	K.DIGS(+79.97)ES(+79.97)TEDQ.A	44.78	1239.36	10	2.4	1240.37	1	17.15	58	67	Phosphorylation (STY)	S4:Phosphorylation (STY):9.42;S6:Phosphorylation (STY):9.34	PEAKS PTM
	K.DIGS(+79.97)EST(+79.97)EDQAMEDI.K	40.48	1798.59	15	8.5	900.31	2	32.27	58	72	Phosphorylation (STY)	S4:Phosphorylation (STY):0.00;T7:Phosphorylation (STY):0.00	PEAKS PTM
	R.YLGYLEQLLR.L	45.8	1266.7	10	6.3	634.36	2	42.66	106	115			PEAKS DB
	R.YLGYLEQL.L	40.78	997.512	8	7.5	998.527	1	39.11	106	113			PEAKS DB
	R.YLGYLEQ.L	37.66	884.428	7	5.7	885.44	1	30.18	106	112			PEAKS DB
	K.VPQLEIVPNS(+79.97)AEER.L	67.41	1659.79	14	4.8	830.905	2	30.92	121	134	Phosphorylation (STY)	S10:Phosphorylation (STY):1000.00	PEAKS PTM
	K.VPQLEIVPNS(+79.97)AEE.R	47.87	1503.69	13	5.6	752.854	2	32.82	121	133	Phosphorylation (STY)	S10:Phosphorylation (STY):1000.00	PEAKS PTM
	K.VPQLEIVPN(+21.98).S	40.34	1029.55	9	-4.6	515.778	2	32.74	121	129	Sodium adduct	N9:Sodium adduct:33.81	PEAKS PTM
	K.VPQLEIVPN.S	38.23	1007.57	9	5.1	1008.58	1	32.78	121	129			PEAKS DB
	K.VPQLEIV.P	35.29	796.469	7	-4.5	797.473	1	34.68	121	127			PEAKS DB
	P.Q(-17.03)LEIVPN.S	51.61	794.417	7	-7.7	795.419	1	34.35	123	129	Pyro-glu from Q	Q1:Pyro-glu from Q:1000.00	PEAKS PTM
	P.QLEIVPNS(+79.97)AEER.L	48.57	1463.67	12	-0.2	732.84	2	27.2	123	134	Phosphorylation (STY)	S8:Phosphorylation (STY):1000.00	PEAKS PTM
	P.QLEIVPN.S	37.32	811.444	7	1.1	812.452	1	28.33	123	129			PEAKS DB
	Q.LEIVPNS(+79.97)AEE.R	55.78	1179.51	10	4.5	1180.52	1	28.07	124	133	Phosphorylation (STY)	S7:Phosphorylation (STY):1000.00	PEAKS PTM
	Q.LEIVPNS(+79.97)AEER.L	48.95	1335.61	11	-1	668.81	2	26.31	124	134	Phosphorylation (STY)	S7:Phosphorylation (STY):1000.00	PEAKS PTM
	L.EIVPNS(+79.97)AEER.L	57.76	1222.52	10	1.9	1223.53	1	21.71	125	134	Phosphorylation (STY)	S6:Phosphorylation (STY):1000.00	PEAKS PTM
	L.EIVPNSAEE.R	55.91	986.456	9	6.2	987.469	1	22.87	125	133			PEAKS DB
	L.EIVPNS(+79.97)A.E	49.21	808.337	7	7.3	809.35	1	22.35	125	131	Phosphorylation (STY)	S6:Phosphorylation (STY):1000.00	PEAKS PTM
	L.EIVPNS(+79.97)AEE.R	46.65	1066.42	9	6.3	1067.44	1	22.89	125	133	Phosphorylation (STY)	S6:Phosphorylation (STY):1000.00	PEAKS PTM
	L.EIVPN(+.98)S(+79.97)AEE.R	40.69	1067.41	9	8.3	1068.42	1	23.51	125	133	Deamidation (NQ); Phosphorylation (STY)	N5:Deamidation (NQ):1000.00;S6:Phosphorylation (STY):1000.00	PEAKS PTM
	E.IVPNS(+79.97)AEE.R	42.2	937.379	8	9.7	938.396	1	20.12	126	133	Phosphorylation (STY)	S5:Phosphorylation (STY):1000.00	PEAKS PTM
	V.PNS(+79.97)AEER.L	60.04	881.328	7	3.5	882.338	1	21.8	128	134	Phosphorylation (STY)	S3:Phosphorylation (STY):1000.00	PEAKS PTM
	K.EPMIGVN.Q	40.18	758.363	7	4.4	759.374	1	25.53	148	154			PEAKS DB
	M.IGVN(+.98)QEL.A	45.66	772.397	7	-6	773.399	1	27.36	151	157	Deamidation (NQ)	N4:Deamidation (NQ):20.92	PEAKS PTM
	M.IGVNQEL.A	34.96	771.413	7	3.6	772.423	1	26.58	151	157			PEAKS DB
	M.IGVNQELA.Y	34.33	842.45	8	0.7	843.458	1	25.95	151	158			PEAKS DB
	F.YQLDAYPS.G	34.45	955.429	8	3.2	956.439	1	27.52	169	176			PEAKS DB
	Y.QLDAYPS.G	37.8	792.365	7	1.8	793.374	1	23.28	170	176			PEAKS DB
	Y.Q(-17.03)LDAYPS.G	37.59	775.339	7	4.9	776.35	1	27.99	170	176	Pyro-glu from Q	Q1:Pyro-glu from Q:1000.00	PEAKS PTM
	T.QYTDAPS.F	32.69	780.329	7	2.1	781.338	1	18.13	187	193			PEAKS DB
	Y.TDAPSFSD(+21.98)IPNPI.G	40.21	1394.63	13	4.7	698.327	2	37.98	189	201	Sodium adduct	D8:Sodium adduct:28.13	PEAKS PTM
	Y.TDAPSFSD(+37.95)IPNPI.G	37.85	1410.6	13	7.3	706.311	2	37.98	189	201	Replacement of 2 protons by calcium	D8:Replacement of 2 protons by calcium:35.03	PEAKS PTM
	S.FSDIPNPI.G	36.75	901.455	8	1.9	902.463	1	33.75	194	201			PEAKS DB
	F.SDIPNPIG(+14.02).S	33.93	825.423	8	-2.6	826.428	1	28.19	195	202	Methylation(C-term)	G8:Methylation(C-term):1000.00	PEAKS PTM
	F.SDIPNPI.G	32.35	754.386	7	4.8	755.397	1	28.56	195	201			PEAKS DB
	I.GSENSEK.T	32.33	749.319	7	3.6	750.329	1	1.66	202	208			PEAKS DB
P02754|LACB_BOVIN	V.YVEELKPTPEGDLE.I	51.54	1617.78	14	7.3	809.902	2	27.83	58	71			PEAKS DB
	V.YVEELKPTPEGDL.E	48.3	1488.73	13	6.1	745.379	2	28.86	58	70			PEAKS DB
	V.YVEELKPTPEGDLEI.L	45.77	1730.86	15	6.3	866.443	2	34.08	58	72			PEAKS DB
	V.YVEELKPTPEGD.L	42.07	1375.65	12	9.5	688.839	2	24.05	58	69			PEAKS DB
	V.YVEELKPTPE.G	40.63	1203.6	10	1.3	602.809	2	24.09	58	67			PEAKS DB
	Y.VEELKPTPEGDL.E	50.83	1325.67	12	4.2	663.846	2	26.7	59	70			PEAKS DB
	Y.VEELKPTPEGDLEI.L	49.88	1567.8	14	6	784.911	2	31.99	59	72			PEAKS DB
	Y.VEELKPTPEGDLE.I	47.86	1454.71	13	4.8	728.368	2	25.83	59	71			PEAKS DB
	Y.VEELKPTPEGD(+21.98)LE.I	43.66	1476.7	13	-4.6	739.352	2	25.71	59	71	Sodium adduct	D11:Sodium adduct:14.04	PEAKS PTM
	Y.VEELKPTPE.G	43.19	1040.54	9	4.5	1041.55	1	21.67	59	67			PEAKS DB
	Y.VEELKPTPEGD.L	42.72	1212.59	11	6.9	607.305	2	21.86	59	69			PEAKS DB
	Y.VEELKPTPE(+21.98)GDLE.I	34.45	1476.7	13	3.9	739.358	2	25.83	59	71	Sodium adduct	E9:Sodium adduct:14.04	PEAKS PTM
	E.ELKPTPEGDL.E	43.55	1097.56	10	3.7	1098.57	1	26.58	61	70			PEAKS DB
	E.ELKPTPE.G	36.83	812.428	7	2.6	813.437	1	21.67	61	67			PEAKS DB
	N.SAEPEQS.L	36.69	746.308	7	1.4	747.317	1	13	126	132			PEAKS DB
	N.SAE(+21.98)PEQS.L	33.05	768.29	7	-2.8	769.295	1	12.82	126	132	Sodium adduct	E3:Sodium adduct:0.00	PEAKS PTM
	R.TPEVDDEALEK.F	57.72	1244.58	11	3.2	623.298	2	23.28	141	151			PEAKS DB
	R.TPEVDDEALE.K	56.72	1116.48	10	6.3	1117.5	1	25.55	141	150			PEAKS DB
	R.TPEVDDEA.L	50.08	874.356	8	2.9	875.365	1	20.25	141	148			PEAKS DB
	R.TPEVDDE.A	45.74	803.318	7	1.4	804.327	1	18.5	141	147			PEAKS DB
	R.TPEVD(-18.01)DE.A	37.59	785.308	7	5.9	786.32	1	20.01	141	147	Dehydration	D5:Dehydration:13.80	PEAKS PTM
	R.TPEVDD(-18.01)E.A	36.43	785.308	7	-6.9	786.31	1	20.26	141	147	Dehydration	D6:Dehydration:24.44	PEAKS PTM
	P.EVDDEALE.K	32.51	918.382	8	4	919.393	1	22.65	143	150			PEAKS PTM
P02668|CASK_BOVIN	A.Q(-17.03)EQNQEQPI.R	54.47	1095.48	9	6.4	1096.5	1	23.33	22	30	Pyro-glu from Q	Q1:Pyro-glu from Q:1000.00	PEAKS PTM
	Y.YQQKPVA.L	36.32	832.444	7	0.4	833.452	1	15.93	64	70			PEAKS DB
	K.NQDKT(-18.01)EI.P	32.93	828.398	7	1.5	829.406	1	20.47	134	140	Dehydration	T5:Dehydration:39.76	PEAKS PTM
	K.TEIPTINT.I	44.22	887.46	8	-3.7	888.464	1	27.75	138	145			PEAKS DB
	T.EIPTINT.I	35.61	786.412	7	1.6	787.421	1	26.37	139	145			PEAKS DB
	N.TIAS(+79.97)GEPT.S	48.08	854.342	8	5.3	855.354	1	20.47	145	152	Phosphorylation (STY)	S4:Phosphorylation (STY):25.70	PEAKS PTM
	T.IAS(+79.97)GEPT.S	44.24	753.295	7	-1.6	754.301	1	18.59	146	152	Phosphorylation (STY)	S3:Phosphorylation (STY):25.70	PEAKS PTM
	T.STPTTEA.V	35.36	705.318	7	1	706.326	1	15.11	153	159			PEAKS DB
	V.ATLEDS(+79.97)PEV.I	58.03	1039.41	9	3.9	1040.42	1	24.56	165	173	Phosphorylation (STY)	S6:Phosphorylation (STY):51.96	PEAKS PTM
	A.TLEDS(+79.97)PEV.I	47.71	968.374	8	7.6	969.389	1	23.99	166	173	Phosphorylation (STY)	S5:Phosphorylation (STY):76.73	PEAKS PTM
	T.LEDS(+79.97)PEV.I	51.11	867.326	7	6	868.339	1	22.93	167	173	Phosphorylation (STY)	S4:Phosphorylation (STY):1000.00	PEAKS PTM
	I.ESPPEINT.V	49.36	885.408	8	0.5	886.416	1	22.66	175	182			PEAKS DB
	I.ESP(-30.01)PEINT.V	41.08	855.397	8	3.1	856.407	1	23.39	175	182	Proline oxidation to pyrrolidinone	P3:Proline oxidation to pyrrolidinone:23.10	PEAKS PTM
	I.ESPPEIN(-18.01).T	40.65	766.35	7	-1.2	767.356	1	22.88	175	181	Dehydration	N7:Dehydration:23.70	PEAKS PTM
	I.ESPPEIN.T	37.72	784.36	7	-7.2	785.362	1	21.36	175	181			PEAKS DB
P02663|CASA2_BOVIN	K.NMAINPS(+79.97)K.E	53.6	953.404	8	5.9	954.417	1	20.48	40	47	Phosphorylation (STY)	S7:Phosphorylation (STY):1000.00	PEAKS PTM
	K.N(+.98)MAINPS.K	46.09	746.327	7	5.8	747.338	1	23.04	40	46	Deamidation (NQ)	N1:Deamidation (NQ):37.03	PEAKS PTM
	K.NMAINPS(+79.97)KEN.L	36.25	1196.49	10	3.7	599.254	2	21.22	40	49	Phosphorylation (STY)	S7:Phosphorylation (STY):1000.00	PEAKS PTM
	K.NM(+15.99)AINPS.K	32.25	761.338	7	8.1	762.351	1	22.25	40	46	Oxidation (M)	M2:Oxidation (M):1000.00	PEAKS PTM
	R.N(+.98)AVPITPT.L	48.26	812.428	8	3.7	813.438	1	25.09	130	137	Deamidation (NQ)	N1:Deamidation (NQ):1000.00	PEAKS PTM
	R.NAVPITPT.L	43.25	811.444	8	3.1	812.454	1	24.18	130	137			PEAKS DB
	R.EQLS(+79.97)TS(+79.97)EENS.K	37.24	1282.4	10	9.6	1283.42	1	16.78	141	150	Phosphorylation (STY)	S4:Phosphorylation (STY):9.34;S6:Phosphorylation (STY):9.34	PEAKS PTM
	L.STS(+79.97)EENS.K	40.33	832.249	7	0.4	833.256	1	3.6	144	150	Phosphorylation (STY)	S3:Phosphorylation (STY):14.04	PEAKS PTM
	K.TVDMES(+79.97)TEV.F	61.17	1089.39	9	4.9	1090.41	1	25.03	153	161	Phosphorylation (STY)	S6:Phosphorylation (STY):8.69	PEAKS PTM
	K.TVDMES(+79.97)T.E	52.83	861.283	7	1	862.291	1	19.37	153	159	Phosphorylation (STY)	S6:Phosphorylation (STY):7.65	PEAKS PTM
	K.TVDM(+15.99)ES(+79.97)TEV.F	49.57	1105.39	9	4	1106.4	1	20.88	153	161	Oxidation (M); Phosphorylation (STY)	M4:Oxidation (M):1000.00;S6:Phosphorylation (STY):10.53	PEAKS PTM
	K.TVDMESTEV.F	39.7	1009.43	9	6	1010.44	1	25.19	153	161			PEAKS DB
	T.VDMES(+79.97)TEV.F	49.53	988.346	8	4	989.357	1	24.76	154	161	Phosphorylation (STY)	S5:Phosphorylation (STY):0.00	PEAKS PTM
	V.DMES(+79.97)TEV.F	43.42	889.278	7	3.4	890.288	1	22.42	155	161	Phosphorylation (STY)	S4:Phosphorylation (STY):0.00	PEAKS PTM
	V.DMESTEV.F	32.85	809.311	7	-2.8	810.316	1	21.98	155	161			PEAKS DB
	K.LTEEEKN.R	34.55	861.408	7	4.9	862.419	1	13.22	168	174			PEAKS DB
P00792|PEPA_BOVIN	F.GTIGIGTPA.Q	33.61	785.428	9	1.2	786.437	1	26.09	62	70			PEAKS DB
	I.FDTGSSN.L	46.76	726.282	7	2.3	727.291	1	15.48	77	83			PEAKS DB
	F.GLSETEPGS.F	39.36	875.387	9	0.5	876.395	1	19.83	148	156			PEAKS DB
	L.SETEPGS.F	38.26	705.282	7	1.8	706.29	1	13.22	150	156			PEAKS DB
	S.SIDSLPDIV.F	41.19	957.502	9	7.8	958.517	1	37.63	297	305			PEAKS DB
	S.SIDSLPDI.V	34.53	858.433	8	0.8	859.441	1	34.79	297	304			PEAKS DB
	I.DSLPDIV.F	32.74	757.386	7	-8.2	758.387	1	32.98	299	305			PEAKS DB
P00711|LALBA_BOVIN	Y.GGVSLPEWV.C	43.24	942.481	9	6.2	943.494	1	40.38	38	46			PEAKS DB
	K.FLDDDLTDDI.M	45.84	1180.51	10	2.4	1181.52	1	37.93	99	108			PEAKS DB
	K.FLDDDLTD(+21.98)DI.M	33.2	1202.5	10	6.5	602.259	2	37.89	99	108	Sodium adduct	D8:Sodium adduct:0.00	PEAKS PTM
	F.LDDDLTDDI.M	45.24	1033.45	9	3.6	1034.46	1	31.94	100	108			PEAKS DB
	L.DDDLTDDI.M	40.66	920.361	8	4.6	921.373	1	28.19	101	108			PEAKS DB
	L.DDDLTDDIM.C	35.58	1051.4	9	7.8	1052.42	1	31.89	101	109			PEAKS DB
P80195|GLCM1_BOVIN	A.ILNKPEDET.H	37.66	1057.53	9	-2.4	1058.53	1	19.6	19	27			PEAKS DB
	L.NKPEDET.H	36.5	831.361	7	2.9	832.371	1	19.72	21	27			PEAKS DB
	R.Q(-17.03)PQSQNPK.L	50.88	908.435	8	-0.9	909.442	1	14.68	75	82	Pyro-glu from Q	Q1:Pyro-glu from Q:1000.00	PEAKS PTM
	R.Q(+43.01)PQSQNPK.L	33.3	968.467	8	0	485.241	2	20.91	75	82	Carbamylation	Q1:Carbamylation:39.40	PEAKS PTM
Q17QX2|ZGPAT_BOVIN	V.VEPGAANP.G	37.83	753.366	8	7.3	754.378	1	29.76	294	301			PEAKS DB

## Sheet: ApicalCompartment_N2
Uniprot access number | protein acronym	Amino acid sequences of identified peptides	Peaks Studio score (-10log P)	Theoretical monoisotopic mass (Da)	Length	ppm	m/z	z	Retention time	Start	End	Post-translational modifications	AScore	Found By
P02666|CASB_BOVIN	E.LNVPGEIVE(+21.98)SL.S	51.35	1190.62	11	-6.7	596.311	2	21.46	21	31	Sodium adduct	E9:Sodium adduct:11.10	PEAKS PTM
	L.NVPGEIVES(+79.97)L.S	63.09	1135.52	10	2.8	1136.53	1	17.65	22	31	Phosphorylation (STY)	S9:Phosphorylation (STY):1000.00	PEAKS PTM
	L.NVPGEIVE.S	37.12	855.434	8	2.3	856.443	1	12.9	22	29			PEAKS DB
	L.NVPGEIVESL.S	35.91	1055.55	10	2.7	1056.56	1	18.7	22	31			PEAKS DB
	K.FQS(+79.97)EEQQQ.T	60.75	1102.4	8	2.3	1103.41	1	7.73	48	55	Phosphorylation (STY)	S3:Phosphorylation (STY):1000.00	PEAKS PTM
	K.FQS(+79.97)EEQQQTEDELQDK.I	60.53	2060.82	16	4.8	1031.42	2	12.09	48	63	Phosphorylation (STY)	S3:Phosphorylation (STY):47.92	PEAKS PTM
	K.FQS(+79.97)EEQQQTEDEL.Q	57.28	1689.64	13	-0.3	845.827	2	13.75	48	60	Phosphorylation (STY)	S3:Phosphorylation (STY):64.21	PEAKS PTM
	K.FQS(+79.97)EEQQ.Q	56.81	974.338	7	4.4	975.35	1	7.38	48	54	Phosphorylation (STY)	S3:Phosphorylation (STY):1000.00	PEAKS PTM
	K.FQS(+79.97)EEQQQTEDE.L	52.74	1576.56	12	0.6	789.286	2	9.46	48	59	Phosphorylation (STY)	S3:Phosphorylation (STY):10.02	PEAKS PTM
	K.FQSEEQQQT(+79.97)EDE.L	38.55	1576.56	12	-0.2	789.285	2	9.41	48	59	Phosphorylation (STY)	T9:Phosphorylation (STY):0.00	PEAKS PTM
	Q.Q(-17.03)QTEDEL.Q	47.82	844.345	7	4.9	845.356	1	12.39	54	60	Pyro-glu from Q	Q1:Pyro-glu from Q:1000.00	PEAKS PTM
	Q.QQTEDELQDK.I	36.36	1232.55	10	0.3	617.283	2	8.22	54	63			PEAKS DB
	Q.TEDELQDK.I	48.74	976.435	8	4.4	977.446	1	7.13	56	63			PEAKS DB
	Q.TEDELQD.K	36.55	848.34	7	4.7	849.351	1	8.91	56	62			PEAKS DB
	Q.TEDELQDKIHP.F	33.73	1323.63	11	2.4	662.824	2	10.75	56	66			PEAKS DB
	T.Q(-17.03)SLVYPFPGPI.P	48.22	1199.62	11	2.2	600.82	2	24.75	71	81	Pyro-glu from Q	Q1:Pyro-glu from Q:1000.00	PEAKS PTM
	T.Q(-17.03)SLVYPFPGPIPN.S	43.99	1410.72	13	-4.4	706.363	2	24.2	71	83	Pyro-glu from Q	Q1:Pyro-glu from Q:1000.00	PEAKS PTM
	Q.SLVYPFPGPIPN.S	68.85	1299.69	12	2.1	1300.7	1	21.64	72	83			PEAKS DB
	Q.SLVYPFPGPI.P	55.63	1088.59	10	0.9	1089.6	1	23.19	72	81			PEAKS DB
	Q.SLVYPFPGPIPN(+21.98).S	48.44	1321.67	12	0.1	661.841	2	21.59	72	83	Sodium adduct	N12:Sodium adduct:1000.00	PEAKS PTM
	Q.SLVYPFPGPI(+21.98).P	37.91	1110.57	10	-5	556.291	2	23.21	72	81	Sodium adduct	I10:Sodium adduct:1000.00	PEAKS PTM
	S.LVYPFPGPIPN.S	74.02	1212.65	11	2.2	1213.66	1	21.15	73	83			PEAKS DB
	S.LVYPFPGPI.P	54.08	1001.56	9	0.2	1002.57	1	22.71	73	81			PEAKS DB
	S.LVYPFPGPIPN(+21.98).S	45.83	1234.64	11	0.2	618.326	2	21.19	73	83	Sodium adduct	N11:Sodium adduct:1000.00	PEAKS PTM
	S.LVYPFPGPIPNS.L	34.47	1299.69	12	-2.5	650.849	2	20.81	73	84			PEAKS DB
	L.VYPFPGPIPN.S	59.69	1099.57	10	-2.8	1100.57	1	19.28	74	83			PEAKS DB
	L.V(+71.04)YPFPGPI.P	57.98	959.512	8	0.8	960.52	1	21.07	74	81	Propionamide (K X@N-term)	V1:Propionamide (K X@N-term):1000.00	PEAKS PTM
	L.VYPFPGPIPN(+.98)SLPQ.N	50.26	1525.78	14	-2.5	763.896	2	21.1	74	87	Deamidation (NQ)	N10:Deamidation (NQ):48.12	PEAKS PTM
	L.VYPFPGPI.P	50.18	888.475	8	1.4	889.483	1	21.39	74	81			PEAKS DB
	L.VYPFPGPIPN(+21.98).S	42.96	1121.55	10	1.6	1122.56	1	19.34	74	83	Sodium adduct	N10:Sodium adduct:1000.00	PEAKS PTM
	L.VYPFPGPIPNS(+21.98).L	37.91	1208.58	11	1.5	605.3	2	18.94	74	84	Sodium adduct	S11:Sodium adduct:1000.00	PEAKS PTM
	V.YPFPGPIPN.S	54.47	1000.5	9	6.6	1001.52	1	18.33	75	83			PEAKS DB
	V.YPFPGPI.P	41.91	789.406	7	-3.1	790.411	1	19.7	75	81			PEAKS DB
	Y.PFPGPIPN.S	48.53	837.438	8	-4.5	838.442	1	15.98	76	83			PEAKS DB
	P.FPGPIPNS(+43.04).L	40.34	870.46	8	2.2	871.469	1	19.32	77	84	Carboxyl modification with ethanolamine	S8:Carboxyl modification with ethanolamine:1000.00	PEAKS PTM
	N.SLPQNIPPLTQTPVVVPPFLQPEV.M	58.61	2609.45	24	5.8	1305.74	2	24.6	84	107			PEAKS DB
	N.SLPQNIPPLTQT.P	57.84	1307.71	12	0	1308.72	1	16.53	84	95			PEAKS DB
	N.SLPQNIPPLTQTPVVVPPFLQPE.V	57.65	2510.38	23	2.3	1256.2	2	24.53	84	106			PEAKS DB
	N.SLPQNIPPLTQTPV.V	50.94	1503.83	14	-2.6	1504.83	1	18.67	84	97			PEAKS DB
	N.SLPQNIPPLTQTPVVVPPFLQPEV(+21.98).M	50.57	2631.43	24	7.2	1316.73	2	24.59	84	107	Sodium adduct	V24:Sodium adduct:8.14	PEAKS PTM
	N.SLPQNIPPLTQTPVVVPPFLQPE(+21.98)V.M	46.71	2631.43	24	8.3	1316.73	2	24.59	84	107	Sodium adduct	E23:Sodium adduct:7.21	PEAKS PTM
	N.SLPQNIPPLTQT(+21.98).P	40.12	1329.69	12	-0.2	665.852	2	16.55	84	95	Sodium adduct	T12:Sodium adduct:1000.00	PEAKS PTM
	N.SLPQNIPPLTQTPV(+21.98).V	39.35	1525.81	14	2.9	763.915	2	18.63	84	97	Sodium adduct	V14:Sodium adduct:1000.00	PEAKS PTM
	N.SLPQNIPPLTQT(-18.01).P	35.82	1289.7	12	-6.8	645.852	2	16.63	84	95	Dehydration	T12:Dehydration:8.18	PEAKS PTM
	N.SLPQNIPPL(+21.98).T	34.51	999.537	9	-3.6	500.774	2	18.15	84	92	Sodium adduct	L9:Sodium adduct:1000.00	PEAKS PTM
	L.PQNIPPLTQTPVVVPPFLQPEV.M	71.61	2409.33	22	-5.4	804.113	3	24.54	86	107			PEAKS DB
	L.PQNIPPLTQTPV.V	40.19	1303.71	12	-4.9	652.861	2	16.33	86	97			PEAKS DB
	L.PQNIPPLTQT(+21.98).P	36.67	1129.57	10	-6.5	565.791	2	16.59	86	95	Sodium adduct	T10:Sodium adduct:1000.00	PEAKS PTM
	Q.NIPPLTQTPVVVPPFLQPE(+21.98)V.M	63.15	2206.2	20	4.4	1104.11	2	24.59	88	107	Sodium adduct	E19:Sodium adduct:20.92	PEAKS PTM
	Q.NIPPLTQTPVVVPPFLQPEV.M	54.35	2184.22	20	6.1	1093.12	2	24.57	88	107			PEAKS DB
	Q.NIPPLTQTPVVVPPFLQPEV(+21.98).M	54.33	2206.2	20	5.9	1104.11	2	24.58	88	107	Sodium adduct	V20:Sodium adduct:0.00	PEAKS PTM
	Q.NIPPLTQTPVVVPPFLQPE(+21.98).V	53.92	2107.13	19	1.9	1054.58	2	24.49	88	106	Sodium adduct	E19:Sodium adduct:1000.00	PEAKS PTM
	Q.NIPPLTQTPV.V	53.79	1078.6	10	1.3	1079.61	1	16.43	88	97			PEAKS DB
	Q.NIPPLTQTPVVVPPFLQPE.V	44.89	2085.15	19	4.4	1043.59	2	24.47	88	106			PEAKS DB
	Q.NIPPLTQTPVVVPPFLQ(-18.01).P	44.32	1841.05	17	2.2	921.532	2	24.64	88	104	Dehydration	Q17:Dehydration:76.18	PEAKS PTM
	Q.NIPPLTQT.P	42.29	882.481	8	2	883.49	1	14.29	88	95			PEAKS DB
	Q.NIPPLTQT(-18.01)PV.V	38.26	1060.59	10	0.6	531.303	2	16.43	88	97	Dehydration	T8:Dehydration:15.73	PEAKS PTM
	Q.NIPPLTQTPVVVPPFLQPEVM(+15.99).G	35.05	2331.25	21	1.8	778.094	3	24.51	88	108	Oxidation (M)	M21:Oxidation (M):1000.00	PEAKS PTM
	I.PPLTQTPVVVPPFLQPEV.M	55.64	1957.09	18	6.4	979.56	2	24.62	90	107			PEAKS DB
	I.PPLTQT(-18.01)PV.V	50.19	833.465	8	-6.3	834.467	1	16.57	90	97	Dehydration	T6:Dehydration:36.05	PEAKS PTM
	L.TQTPVVVPPFLQPE(+21.98)V.M	65.01	1671.88	15	-1.3	836.949	2	23.39	93	107	Sodium adduct	E14:Sodium adduct:10.11	PEAKS PTM
	L.TQTPVVVPPFLQPEV.M	46.17	1649.9	15	-5.3	825.954	2	23.3	93	107			PEAKS DB
	L.TQTPVVVPPFLQPEV(+21.98).M	34.19	1671.88	15	-1.3	836.949	2	23.39	93	107	Sodium adduct	V15:Sodium adduct:0.00	PEAKS PTM
	T.QTPVVVPPFLQPEV.M	44.19	1548.86	14	-5.8	775.43	2	23.46	94	107			PEAKS DB
	Q.TPVVVPPFLQPEV(+21.98).M	58.3	1442.78	13	-7.7	722.391	2	23.53	95	107	Sodium adduct	V13:Sodium adduct:10.11	PEAKS PTM
	Q.TPVVVPPFLQPE(+21.98)V.M	53.99	1442.78	13	-2.8	722.394	2	23.56	95	107	Sodium adduct	E12:Sodium adduct:8.69	PEAKS PTM
	Q.TPVVVPPFLQPEV.M	47.92	1420.8	13	-3.6	711.403	2	23.54	95	107			PEAKS DB
	T.PVVVPPFLQPEV.M	62.39	1319.75	12	5.6	1320.76	1	23.6	96	107			PEAKS DB
	T.PVVVPPFLQPE(+21.98)VMG.V	60.72	1529.79	14	-4.2	765.9	2	24.33	96	109	Sodium adduct	E11:Sodium adduct:28.36	PEAKS PTM
	T.PVVVPPFLQ(-18.01).P	56.08	976.574	9	-4.8	977.577	1	22.05	96	104	Dehydration	Q9:Dehydration:1000.00	PEAKS PTM
	T.PVVVPPFLQPEVM(+15.99).G	54.89	1466.78	13	-3	734.397	2	22.62	96	108	Oxidation (M)	M13:Oxidation (M):1000.00	PEAKS DB
	T.PVVVPPFLQPE.V	53.76	1220.68	11	-0.9	1221.69	1	22.06	96	106			PEAKS DB
	T.PVVVPPFLQPE(+21.98)V.M	53.62	1341.73	12	-4.2	671.87	2	23.43	96	107	Sodium adduct	E11:Sodium adduct:24.44	PEAKS PTM
	T.PVVVPPFLQ(+.98)PEV.M	49.66	1320.73	12	4.5	661.377	2	24.21	96	107	Deamidation (NQ)	Q9:Deamidation (NQ):1000.00	PEAKS PTM
	T.PVVVPPFLQPE(+21.98).V	48.51	1242.66	11	-8.2	622.333	2	22	96	106	Sodium adduct	E11:Sodium adduct:1000.00	PEAKS PTM
	T.PVVVPPF.L	42.41	753.442	7	-1.1	754.449	1	19.64	96	102			PEAKS DB
	T.PVVVPPFLQPEVMG.V	38.73	1507.81	14	2.8	754.915	2	24.34	96	109			PEAKS DB
	T.PVVVPPFLQPE(+37.96)V.M	37.96	1357.7	12	-3.6	679.857	2	23.6	96	107	Replacement of proton by potassium	E11:Replacement of proton by potassium:12.28	PEAKS PTM
	T.PVVVPPFLQPE(+37.95).V	36.16	1258.63	11	-2.4	630.319	2	22.16	96	106	Replacement of 2 protons by calcium	E11:Replacement of 2 protons by calcium:1000.00	PEAKS PTM
	P.VVVPPFLQPE(+21.98)V.M	38.33	1244.68	11	-5.5	623.343	2	22.88	97	107	Sodium adduct	E10:Sodium adduct:0.00	PEAKS PTM
	P.VVVPPFLQPEV(+21.98).M	36.02	1244.68	11	-2	623.345	2	22.86	97	107	Sodium adduct	V11:Sodium adduct:0.00	PEAKS PTM
	V.VVPPFLQPEV.M	46.38	1123.63	10	4.3	1124.64	1	21.12	98	107			PEAKS DB
	V.VVPPFLQ(-18.01).P	40.51	780.453	7	1.2	781.462	1	19.21	98	104	Dehydration	Q7:Dehydration:1000.00	PEAKS PTM
	V.VVPPFLQPE(+21.98)V.M	40.04	1145.61	10	-0.1	573.812	2	21.14	98	107	Sodium adduct	E9:Sodium adduct:17.01	PEAKS PTM
	V.VVPPFLQPEVMG(+21.98).V	36.94	1333.67	12	-2	667.842	2	22.08	98	109	Sodium adduct	G12:Sodium adduct:12.33	PEAKS PTM
	V.VVPPFLQPE.V	36.43	1024.56	9	2.9	1025.57	1	19.17	98	106			PEAKS DB
	V.VPPFLQPEV.M	44.93	1024.56	9	3.1	1025.57	1	23.65	99	107			PEAKS DB
	V.PPFLQPE(+21.98)V.M	36.34	947.473	8	-4	474.742	2	21.31	100	107	Sodium adduct	E7:Sodium adduct:8.69	PEAKS PTM
	V.PPFLQPEV.M	34.65	925.491	8	-1	926.497	1	21.17	100	107			PEAKS DB
	K.HK(+108.02)EMPFPK.Y	39.17	1120.54	8	-1	561.275	2	9.07	121	128	HydroxymethylOP	K2:HydroxymethylOP:81.36	PEAKS PTM
	P.K(-15.01)YPVEPF.T	50.26	863.443	7	-5.7	864.445	1	19.52	128	134	ISD (z+2)-series	K1:ISD (z+2)-series:1000.00	PEAKS PTM
	L.TLTDVEN.L	40.83	790.371	7	1.3	791.379	1	9.61	141	147			PEAKS DB
	L.TLTD(+21.98)VEN.L	35.31	812.353	7	2.3	813.362	1	9.63	141	147	Sodium adduct	D4:Sodium adduct:18.23	PEAKS PTM
	L.TDVEN(+.98)LHLPLPL.L	51.15	1360.72	12	-4.9	681.366	2	22.67	143	154	Deamidation (NQ)	N5:Deamidation (NQ):1000.00	PEAKS PTM
	T.DVEN(+.98)LHLPLPL.L	43.29	1259.68	11	-1.8	630.844	2	23.37	144	154	Deamidation (NQ)	N4:Deamidation (NQ):1000.00	PEAKS PTM
	W.MHQPHQPLPPT.V	66.77	1281.63	11	5.1	1282.64	1	9.49	159	169			PEAKS DB
	W.MHQPHQPLPPT(-18.01).V	45.25	1263.62	11	-0.3	422.213	3	9.53	159	169	Dehydration	T11:Dehydration:1000.00	PEAKS PTM
	W.MHQPHQPLPPT(+21.98).V	44.32	1303.61	11	-1	652.812	2	9.59	159	169	Sodium adduct	T11:Sodium adduct:1000.00	PEAKS PTM
	W.MH(+15.99)QPHQPLPPT.V	40.85	1297.62	11	-0.5	649.819	2	8.77	159	169	Oxidation (HW)	H2:Oxidation (HW):14.84	PEAKS PTM
	W.M(+15.99)HQPHQPLPPT.V	36.4	1297.62	11	-5.3	649.816	2	8.93	159	169	Oxidation (M)	M1:Oxidation (M):1000.00	PEAKS DB
	M.HQPHQPLPPT.V	63.45	1150.59	10	2	1151.6	1	8.49	160	169			PEAKS DB
	M.HQPHQPLPPT(-18.01).V	48.58	1132.58	10	-0.2	378.533	3	8.54	160	169	Dehydration	T10:Dehydration:1000.00	PEAKS PTM
	M.HQPHQPLPPTVMFPPQSV.L	39.3	2036.03	18	-3	679.682	3	17.23	160	177			PEAKS DB
	V.MFPPQSV.L	42.82	804.384	7	1.7	805.393	1	15.24	171	177			PEAKS DB
	Q.S(-15.01)KVLPVPQ.K	37.23	851.512	8	-0.4	852.519	1	18.07	183	190	ISD (z+2)-series	S1:ISD (z+2)-series:1000.00	PEAKS PTM
	S.K(+72.02)VLPVPQ.K	38.05	851.512	7	-4.5	852.515	1	18.09	184	190	Carboxyethyl	K1:Carboxyethyl:1000.00	PEAKS PTM
	L.LYQEPVLGPV(+21.98).R	42.71	1135.59	10	-1.3	568.801	2	18.28	207	216	Sodium adduct	V10:Sodium adduct:33.66	PEAKS PTM
	L.YQEPVLGPV.R	48.72	1000.52	9	2.1	1001.53	1	16.83	208	216			PEAKS DB
	L.YQE(+21.98)PVLGPV.R	44.67	1022.5	9	-1.5	512.259	2	16.84	208	216	Sodium adduct	E3:Sodium adduct:46.14	PEAKS PTM
	L.YQEPVLG.P	43.97	804.402	7	2.3	805.411	1	13.4	208	214			PEAKS DB
	L.YQEPVLGPV(+21.98).R	36.04	1022.5	9	-4.4	512.257	2	16.82	208	216	Sodium adduct	V9:Sodium adduct:36.01	PEAKS PTM
	Y.Q(-17.03)EPVLGPV.R	63.44	820.433	8	-2.8	821.438	1	18.51	209	216	Pyro-glu from Q	Q1:Pyro-glu from Q:1000.00	PEAKS PTM
	Y.Q(+164.06)EPVLGPV.R	51.15	1001.52	8	4	1002.53	1	16.92	209	216	O-Diisopropylphosphorylation	Q1:O-Diisopropylphosphorylation:1000.00	PEAKS PTM
	Y.QEPVLGPV.R	43.81	837.46	8	-0.5	838.466	1	15.32	209	216			PEAKS DB
P02662|CASA1_BOVIN	K.HQGLPQE.V	45.25	807.388	7	-0.1	808.395	1	8.41	23	29			PEAKS DB
	H.Q(-17.03)GLPQEV.L	48.43	752.37	7	0.2	753.378	1	15.59	24	30	Pyro-glu from Q	Q1:Pyro-glu from Q:1000.00	PEAKS PTM
	N.LLR(+80.99)FFVAPFPEV.F	46.57	1514.79	12	9	1515.81	1	17.65	35	46	Arginine replacement by Nitropyrimidyl ornithine	R3:Arginine replacement by Nitropyrimidyl ornithine:1000.00	PEAKS PTM
	F.FVAPFPEVFG.K	56.02	1108.56	10	-3.8	1109.56	1	24.08	39	48			PEAKS DB
	F.FVAPFPE(+21.98)VFG.K	44.6	1130.54	10	-2.8	566.276	2	24.09	39	48	Sodium adduct	E7:Sodium adduct:29.32	PEAKS PTM
	F.FVAPFPEVFG(+21.98).K	41.93	1130.54	10	-2.2	566.277	2	24.07	39	48	Sodium adduct	G10:Sodium adduct:12.33	PEAKS PTM
	F.FVAPFPEV.F	36.35	904.469	8	-1	905.476	1	20.9	39	46			PEAKS DB
	F.VAPFPEVFG.K	54.41	961.491	9	2	962.5	1	21.29	40	48			PEAKS DB
	F.V(+71.04)APFPEV.F	46.81	828.438	7	-0.2	829.445	1	17.99	40	46	Propionamide (K X@N-term)	V1:Propionamide (K X@N-term):1000.00	PEAKS PTM
	F.VAPFPE(+21.98)VFG.K	40.29	983.473	9	-4.7	492.741	2	21.4	40	48	Sodium adduct	E6:Sodium adduct:19.05	PEAKS PTM
	F.VAPFPEV.F	34.21	757.401	7	1.1	758.409	1	17.45	40	46			PEAKS DB
	V.APFPEVFG.K	39.94	862.423	8	-3	863.427	1	20.25	41	48			PEAKS DB
	A.PFPEVFG.K	39.02	791.385	7	1	792.393	1	21.39	42	48			PEAKS DB
	E.KVNELS(+79.97)K.D	49.38	896.437	7	-1.1	449.225	2	5.91	51	57	Phosphorylation (STY)	S6:Phosphorylation (STY):1000.00	PEAKS PTM
	E.KVNELS(-18.01)K.D	34.6	798.46	7	0	400.237	2	5.93	51	57	Dehydration	S6:Dehydration:1000.00	PEAKS PTM
	L.SKDIGS(+79.97)EST(+79.97)EDQ.A	45.12	1454.49	12	0.2	728.25	2	7.71	56	67	Phosphorylation (STY)	S6:Phosphorylation (STY):7.32;T9:Phosphorylation (STY):7.65	PEAKS PTM
	L.SKDIGSES(+79.97)T(+79.97)EDQ.A	43.85	1454.49	12	0.2	728.25	2	7.69	56	67	Phosphorylation (STY)	S8:Phosphorylation (STY):5.03;T9:Phosphorylation (STY):3.64	PEAKS PTM
	L.SKDIGS(+79.97)ES(+79.97)TEDQ.A	42.87	1454.49	12	-1.6	728.249	2	7.56	56	67	Phosphorylation (STY)	S6:Phosphorylation (STY):20.70;S8:Phosphorylation (STY):8.69	PEAKS PTM
	K.DIGS(+79.97)ES(+79.97)TEDQAMEDIK.Q	61.79	1926.68	16	-1.6	964.348	2	15.61	58	73	Phosphorylation (STY)	S4:Phosphorylation (STY):22.45;S6:Phosphorylation (STY):17.01	PEAKS PTM
	K.DIGS(+79.97)ES(+79.97)TEDQ.A	47.43	1239.36	10	0.7	1240.37	1	11.29	58	67	Phosphorylation (STY)	S4:Phosphorylation (STY):14.71;S6:Phosphorylation (STY):9.34	PEAKS PTM
	K.EDVPSER.Y	36.53	830.377	7	2	831.386	1	7.14	99	105			PEAKS DB
	R.YLGYLEQL.L	41.68	997.512	8	2.1	998.521	1	20.62	106	113			PEAKS DB
	R.YLGYLEQ.L	40.37	884.428	7	-2.6	885.433	1	15.8	106	112			PEAKS DB
	K.VPQLEIVPNS(+79.97)AEER.L	80.26	1659.79	14	0	830.901	2	16.05	121	134	Phosphorylation (STY)	S10:Phosphorylation (STY):1000.00	PEAKS PTM
	K.VPQLEIVPNS(+79.97)AEE.R	65.68	1503.69	13	0.3	752.85	2	17.4	121	133	Phosphorylation (STY)	S10:Phosphorylation (STY):1000.00	PEAKS PTM
	K.VPQLEIVPN.S	46.16	1007.57	9	0.4	1008.57	1	17.13	121	129			PEAKS DB
	K.VPQLE(+21.98)IVPN.S	44.76	1029.55	9	-6.8	1030.55	1	17.14	121	129	Sodium adduct	E5:Sodium adduct:34.30	PEAKS PTM
	K.VPQLEIVPN(+21.98).S	36.03	1029.55	9	-1	515.78	2	17.12	121	129	Sodium adduct	N9:Sodium adduct:33.81	PEAKS PTM
	P.QLEIVPNS(+79.97)AEER.L	67.47	1463.67	12	-0.7	732.84	2	13.92	123	134	Phosphorylation (STY)	S8:Phosphorylation (STY):1000.00	PEAKS PTM
	P.Q(-17.03)LEIVPN.S	59.28	794.417	7	-1.3	795.424	1	18.68	123	129	Pyro-glu from Q	Q1:Pyro-glu from Q:1000.00	PEAKS PTM
	P.QLE(+21.98)IVPN.S	35.78	833.426	7	-1.6	834.432	1	14.75	123	129	Sodium adduct	E3:Sodium adduct:16.65	PEAKS PTM
	P.QLEIVPN.S	34.52	811.444	7	0.3	812.452	1	14.73	123	129			PEAKS DB
	Q.LEIVPNS(+79.97)AEER.L	69.62	1335.61	11	-3.1	668.809	2	13.36	124	134	Phosphorylation (STY)	S7:Phosphorylation (STY):1000.00	PEAKS PTM
	Q.LEIVPN(+.98)S(+79.97)AEER.L	36.18	1336.59	11	2.4	669.304	2	14.04	124	134	Deamidation (NQ); Phosphorylation (STY)	N6:Deamidation (NQ):1000.00;S7:Phosphorylation (STY):1000.00	PEAKS PTM
	L.EIVPNS(+79.97)AEER.L	65.61	1222.52	10	1	1223.53	1	10.11	125	134	Phosphorylation (STY)	S6:Phosphorylation (STY):1000.00	PEAKS PTM
	L.EIVPNSAEE.R	58.66	986.456	9	0.3	987.463	1	10.83	125	133			PEAKS DB
	L.EIVPNS(+79.97)AEE.R	54.69	1066.42	9	6.9	1067.44	1	11.04	125	133	Phosphorylation (STY)	S6:Phosphorylation (STY):1000.00	PEAKS PTM
	L.EIVPN(+.98)S(+79.97)AEER.L	43.38	1223.51	10	-2.9	612.759	2	10.6	125	134	Deamidation (NQ); Phosphorylation (STY)	N5:Deamidation (NQ):1000.00;S6:Phosphorylation (STY):1000.00	PEAKS PTM
	L.EIVPNSAEER.L	41.02	1142.56	10	0.3	572.286	2	9.8	125	134			PEAKS DB
	L.EIVPN(+.98)S(+79.97)AEE.R	34.46	1067.41	9	7.7	1068.42	1	11.73	125	133	Deamidation (NQ); Phosphorylation (STY)	N5:Deamidation (NQ):1000.00;S6:Phosphorylation (STY):1000.00	PEAKS PTM
	E.IVPNS(+79.97)AEER.L	43.33	1093.48	9	1	547.748	2	8.79	126	134	Phosphorylation (STY)	S5:Phosphorylation (STY):1000.00	PEAKS PTM
	I.VPNS(+79.97)AEER.L	48.2	980.396	8	3.8	491.207	2	10.25	127	134	Phosphorylation (STY)	S4:Phosphorylation (STY):1000.00	PEAKS PTM
	V.PNS(+79.97)AEER.L	76.51	881.328	7	-0.4	882.335	1	10.12	128	134	Phosphorylation (STY)	S3:Phosphorylation (STY):1000.00	PEAKS PTM
	Q.Q(-17.03)KEPMIGV.N	56.2	883.447	8	-0.6	884.454	1	15.48	146	153	Pyro-glu from Q	Q1:Pyro-glu from Q:1000.00	PEAKS PTM
	Q.QKEPMIGV.N	37.69	900.474	8	2.7	901.484	1	12.53	146	153			PEAKS DB
	K.EPMIGVN.Q	39.58	758.363	7	5.1	759.375	1	12.85	148	154			PEAKS DB
	M.IGVN(+.98)QEL.A	49.68	772.397	7	-3.9	773.401	1	14.15	151	157	Deamidation (NQ)	N4:Deamidation (NQ):0.00	PEAKS PTM
	M.IGVNQEL.A	40.87	771.413	7	1.2	772.421	1	13.55	151	157			PEAKS DB
	M.IGVNQELA.Y	37.16	842.45	8	-0.2	843.457	1	13.02	151	158			PEAKS DB
	F.YQLD(+21.98)AYPS.G	38.6	977.411	8	-1.8	978.416	1	14.15	169	176	Sodium adduct	D4:Sodium adduct:32.48	PEAKS PTM
	Y.Q(-17.03)LDAYPS.G	48.87	775.339	7	2.1	776.348	1	15.03	170	176	Pyro-glu from Q	Q1:Pyro-glu from Q:1000.00	PEAKS PTM
	Y.QLDAYPS.G	34.53	792.365	7	2.7	793.375	1	11.2	170	176			PEAKS DB
	Q.L(+57.02)DAYPSGA.W	43.06	849.387	8	-0.2	425.701	2	14.72	171	178	Carbamidomethylation (DHKE X@N-term)	L1:Carbamidomethylation (DHKE X@N-term):7.65	PEAKS PTM
	Y.TDAPSFSD(+21.98)IPNPI.G	53.2	1394.63	13	-1.4	698.323	2	19.82	189	201	Sodium adduct	D8:Sodium adduct:39.44	PEAKS PTM
	Y.TDAPSFSDIPNPI(+21.98).G	44.16	1394.63	13	5.9	698.328	2	19.8	189	201	Sodium adduct	I13:Sodium adduct:23.70	PEAKS PTM
	S.FSDIPNPI.G	46.03	901.455	8	1.6	902.463	1	17.67	194	201			PEAKS DB
	F.SDIPNPI(+21.98).G	41.5	776.368	7	3.5	777.378	1	14.76	195	201	Sodium adduct	I7:Sodium adduct:28.79	PEAKS PTM
	F.SDIPNPIG(+14.02).S	37.42	825.423	8	1.1	826.431	1	14.74	195	202	Methylation(C-term)	G8:Methylation(C-term):1000.00	PEAKS PTM
	F.SDIPN(-17.03)PI.G	34.34	737.36	7	6.7	738.372	1	14.87	195	201	Ammonia-loss (N)	N5:Ammonia-loss (N):1000.00	PEAKS PTM
	F.SDIPNPIG.S	33.97	811.408	8	-5.5	812.41	1	14.46	195	202			PEAKS DB
	I.GSE(+21.98)NSEK.T	35.07	771.301	7	1.6	772.31	1	1.48	202	208	Sodium adduct	E3:Sodium adduct:20.75	PEAKS PTM
P02663|CASA2_BOVIN	E.SIIS(+79.97)QET.Y	37.91	856.358	7	3.8	857.369	1	13.17	28	34	Phosphorylation (STY)	S4:Phosphorylation (STY):0.00	PEAKS PTM
	K.NMAINPS(+79.97)KEN.L	66.34	1196.49	10	2	599.253	2	9.82	40	49	Phosphorylation (STY)	S7:Phosphorylation (STY):1000.00	PEAKS PTM
	K.NMAINPS(+79.97)KE.N	52.03	1082.45	9	0	542.231	2	10.46	40	48	Phosphorylation (STY)	S7:Phosphorylation (STY):1000.00	PEAKS PTM
	K.N(+.98)MAINPS.K	47.02	746.327	7	3.5	747.337	1	11.33	40	46	Deamidation (NQ)	N1:Deamidation (NQ):21.50	PEAKS PTM
	K.NMAINPS(-18.01)KEN.L	40.63	1098.51	10	0.2	550.264	2	9.87	40	49	Dehydration	S7:Dehydration:20.70	PEAKS PTM
	M.AINPS(+79.97)KEN.L	53.95	951.406	8	2.6	952.416	1	6.26	42	49	Phosphorylation (STY)	S5:Phosphorylation (STY):1000.00	PEAKS PTM
	Y.LYQGPIV.L	41.25	788.443	7	-5	789.447	1	16.04	114	120			PEAKS DB
	Y.QGPIVLNPWD(+21.98)QV.K	60.06	1386.69	12	-0.9	694.352	2	21.76	116	127	Sodium adduct	D10:Sodium adduct:26.31	PEAKS PTM
	I.VLNPWDQV.K	48.83	969.492	8	4.3	970.503	1	18.81	120	127			PEAKS DB
	I.VLNPWDQ.V	44.25	870.424	7	1.3	871.432	1	16.08	120	126			PEAKS DB
	D.Q(+.98)VKRNAVPI.T	33.5	1024.6	9	-4.6	1025.61	1	12.05	126	134	Deamidation (NQ)	Q1:Deamidation (NQ):33.81	PEAKS PTM
	R.N(+.98)AVPITPT.L	55.63	812.428	8	3.7	813.438	1	12.77	130	137	Deamidation (NQ)	N1:Deamidation (NQ):1000.00	PEAKS PTM
	R.NAVPITPT.L	42.23	811.444	8	2.3	812.453	1	11.72	130	137			PEAKS DB
	K.KTVDMEST(+79.97)EV.F	51.87	1217.49	10	-1.4	609.751	2	11.42	152	161	Phosphorylation (STY)	T8:Phosphorylation (STY):7.65	PEAKS PTM
	K.TVDMES(+79.97)TEV.F	66.95	1089.39	9	4.2	1090.41	1	12.72	153	161	Phosphorylation (STY)	S6:Phosphorylation (STY):0.00	PEAKS PTM
	K.TVDM(+15.99)ES(+79.97)TEV.F	48.14	1105.39	9	-0.7	1106.4	1	9.98	153	161	Oxidation (M); Phosphorylation (STY)	M4:Oxidation (M):1000.00;S6:Phosphorylation (STY):11.50	PEAKS PTM
	K.TVDMES(-18.01)TEV.F	46.21	991.417	9	3.4	992.428	1	13.64	153	161	Dehydration	S6:Dehydration:17.01	PEAKS PTM
	K.TVDMEST(+79.97)EV.F	44.77	1089.39	9	2	545.705	2	12.72	153	161	Phosphorylation (STY)	T7:Phosphorylation (STY):0.00	PEAKS PTM
	K.TVDMEST(-18.01)EV.F	38.91	991.417	9	1.6	992.426	1	13.66	153	161	Dehydration	T7:Dehydration:0.00	PEAKS PTM
	K.TVDM(+15.99)EST(+79.97)EV.F	37.84	1105.39	9	-0.7	1106.4	1	10	153	161	Oxidation (M); Phosphorylation (STY)	M4:Oxidation (M):1000.00;T7:Phosphorylation (STY):0.00	PEAKS PTM
	K.TVDMESTEV.F	37.74	1009.43	9	6.5	1010.44	1	12.47	153	161			PEAKS DB
	T.VDMEST(+79.97)EV.F	56.78	988.346	8	7.3	989.361	1	12.51	154	161	Phosphorylation (STY)	T6:Phosphorylation (STY):12.28	PEAKS PTM
	T.VDMES(+79.97)TEV.F	56.47	988.346	8	6	989.359	1	12.51	154	161	Phosphorylation (STY)	S5:Phosphorylation (STY):11.06	PEAKS PTM
	V.DMES(+79.97)TEV.F	51.49	889.278	7	1.3	890.286	1	11.11	155	161	Phosphorylation (STY)	S4:Phosphorylation (STY):0.00	PEAKS PTM
	K.TKLTEEEK.N	36.95	976.508	8	-1.8	489.26	2	5.82	166	173			PEAKS DB
	K.LTEEEKN.R	38.2	861.408	7	0.9	862.416	1	5.13	168	174			PEAKS DB
P02668|CASK_BOVIN	A.Q(-17.03)EQNQEQPI.R	62.03	1095.48	9	5.1	1096.5	1	11.54	22	30	Pyro-glu from Q	Q1:Pyro-glu from Q:1000.00	PEAKS PTM
	I.NNQFLPYP.Y	36.97	991.476	8	-2.8	992.481	1	18.26	73	80			PEAKS DB
	F.LPYPY(-18.01)YAKPAA.V	39.31	1234.64	11	0.6	1235.65	1	21.23	77	87	Dehydration	Y5:Dehydration:0.00	PEAKS PTM
	K.SC(+119.00)QAQPT.T	34.38	852.311	7	-1.2	853.317	1	4.91	108	114	Cysteinylation	C2:Cysteinylation:1000.00	PEAKS PTM
	K.NQDKTE(+21.98)IPT.I	47.53	1066.49	9	0.8	534.253	2	9.44	134	142	Sodium adduct	E6:Sodium adduct:41.59	PEAKS PTM
	K.NQDKT(-18.01)EI.P	44.04	828.398	7	0.4	829.405	1	9.44	134	140	Dehydration	T5:Dehydration:55.92	PEAKS PTM
	K.NQDKTEIPT.I	37.6	1044.51	9	6.5	1045.52	1	9.4	134	142			PEAKS DB
	K.TEIPTINT.I	44.19	887.46	8	2	888.469	1	14.31	138	145			PEAKS DB
	K.TEIPTIN.T	36.65	786.412	7	-2.7	787.418	1	13.74	138	144			PEAKS DB
	T.EIPTINT.I	37.4	786.412	7	0.4	787.42	1	13.4	139	145			PEAKS DB
	N.TIAS(+79.97)GEPT.S	56.39	854.342	8	0.6	855.35	1	9.74	145	152	Phosphorylation (STY)	S4:Phosphorylation (STY):13.38	PEAKS PTM
	T.IASGEPT.S	38.16	673.328	7	4.1	674.338	1	7.09	146	152			PEAKS PTM
	V.ATLEDS(+79.97)PEV.I	66.43	1039.41	9	7.6	1040.43	1	12.27	165	173	Phosphorylation (STY)	S6:Phosphorylation (STY):48.12	PEAKS PTM
	A.TLEDS(+79.97)PEV.I	57.17	968.374	8	5.1	969.386	1	11.86	166	173	Phosphorylation (STY)	S5:Phosphorylation (STY):61.37	PEAKS PTM
	T.LEDS(+79.97)PEV.I	55.69	867.326	7	7.7	868.34	1	11.19	167	173	Phosphorylation (STY)	S4:Phosphorylation (STY):1000.00	PEAKS PTM
	I.ESPPEINT.V	49.77	885.408	8	5.4	886.42	1	10.79	175	182			PEAKS DB
	I.ESP(-30.01)PEINT.V	44.95	855.397	8	1.3	856.406	1	11.23	175	182	Proline oxidation to pyrrolidinone	P3:Proline oxidation to pyrrolidinone:27.96	PEAKS PTM
	I.ESPPEIN.T	41.58	784.36	7	-1.3	785.367	1	9.99	175	181			PEAKS DB
P02754|LACB_BOVIN	V.YVEELKPTPEGDL.E	64.15	1488.73	13	2.3	745.376	2	14.81	58	70			PEAKS DB
	V.YVEELKPTPEGDLE.I	61.66	1617.78	14	1.4	809.897	2	14.18	58	71			PEAKS DB
	V.YVEELKPT.P	36.21	977.507	8	-1.6	489.76	2	10.6	58	65			PEAKS DB
	V.YVEELKPTPEGDLEI.L	35.29	1730.86	15	1.7	866.439	2	17.47	58	72			PEAKS DB
	Y.VEELKPTPEGDL.E	59.12	1325.67	12	-2.5	663.841	2	13.36	59	70			PEAKS DB
	Y.VEELKPTPEGDLE.I	56.73	1454.71	13	2.2	728.366	2	12.74	59	71			PEAKS DB
	Y.VEELKPTPEGD.L	52.51	1212.59	11	-1.6	607.3	2	10.09	59	69			PEAKS DB
	Y.VEELKPTPE.G	48.83	1040.54	9	-1	1041.55	1	9.9	59	67			PEAKS DB
	F.C(+119.00)MENSAEPEQS.L	37.46	1342.45	11	-1.3	672.23	2	7.95	122	132	Cysteinylation	C1:Cysteinylation:1000.00	PEAKS PTM
	N.SAEPEQS.L	35.65	746.308	7	2.2	747.317	1	5.12	126	132			PEAKS DB
	R.TPEVDDEALEK.F	59.98	1244.58	11	4.7	623.299	2	11	141	151			PEAKS DB
	R.TPEVDDEA.L	52.41	874.356	8	0.5	875.363	1	9.4	141	148			PEAKS DB
	R.TPEVDD(-18.01)E.A	51.57	785.308	7	2.1	786.317	1	9.32	141	147	Dehydration	D6:Dehydration:17.01	PEAKS PTM
	R.TPEVDDEALEKFD.K	48.7	1506.67	13	3.3	754.346	2	15.75	141	153			PEAKS DB
	R.TPEVDDE.A	44.97	803.318	7	-0.7	804.325	1	8.49	141	147			PEAKS DB
P00711|LALBA_BOVIN	Y.GGVSLPEWV.C	44.55	942.481	9	1.5	943.49	1	21.27	38	46			PEAKS DB
	K.FLDDDLTDDIM.C	51.01	1311.55	11	5.1	1312.57	1	21.54	99	109			PEAKS DB
	K.FLDDDLTDDI.M	44.4	1180.51	10	0	1181.52	1	19.97	99	108			PEAKS DB
	K.FLDDDLTD(+21.98)DIM.C	44.11	1333.54	11	-7.2	667.77	2	21.52	99	109	Sodium adduct	D8:Sodium adduct:11.06	PEAKS PTM
	K.FLDDDLTDD(+21.98)IM.C	41.86	1333.54	11	1.4	667.776	2	21.51	99	109	Sodium adduct	D9:Sodium adduct:0.00	PEAKS PTM
	F.LDDDLTDDIM.C	48.31	1164.49	10	5.4	1165.5	1	18.55	100	109			PEAKS DB
	F.LDDDLTDDI.M	44.56	1033.45	9	4.4	1034.46	1	16.82	100	108			PEAKS DB
	L.DDDLTDDIM.C	44.13	1051.4	9	6.4	1052.42	1	17.06	101	109			PEAKS DB
	L.DDDLTDDI.M	41.9	920.361	8	0.4	921.369	1	14.94	101	108			PEAKS DB
P00792|PEPA_BOVIN	F.GTIGIGTPA.Q	35.15	785.428	9	1.5	786.437	1	13.15	62	70			PEAKS DB
	I.FDTGSSN.L	41.38	726.282	7	7.5	727.295	1	7.02	77	83			PEAKS DB
	V.GGISDTNQ.I	36.56	790.346	8	4.7	791.357	1	6.64	138	145			PEAKS DB
	F.GLSETEPGS.F	36.79	875.387	9	-1.3	876.393	1	9.25	148	156			PEAKS DB
	V.FDNIWDQG.L	44.1	993.419	8	2.9	994.429	1	17.49	183	190			PEAKS DB
	V.FDNIWDQ.G	39.37	936.398	7	-0.9	937.404	1	17.51	183	189			PEAKS DB
	Y.S(+14.02)GSLNWVPV.S	34.9	971.508	9	3.2	972.518	1	19.93	222	230	Methylation(others)	S1:Methylation(others):14.04	PEAKS PTM
	V.ISCSSIDS(-18.01).L	36.05	792.332	8	8.4	793.346	1	14.86	293	300	Dehydration	S8:Dehydration:14.02	PEAKS PTM
	S.SIDSLPDIV.F	42.22	957.502	9	3.6	958.513	1	19.74	297	305			PEAKS DB
	S.SIDS(-18.01)LPDI.V	39.17	840.423	8	3.3	841.433	1	19.79	297	304	Dehydration	S4:Dehydration:0.00	PEAKS PTM
	S.SIDSLPD(-18.01)I.V	36.26	840.423	8	1.6	841.432	1	19.8	297	304	Dehydration	D7:Dehydration:21.87	PEAKS PTM

## Sheet: BasolateralCompartment_N1
Uniprot access number | protein acronym	Amino acid sequences of identified peptides	Peaks Studio score (-10log P)	Theoretical monoisotopic mass (Da)	Length	ppm	m/z	z	Retention time	Start	End	Post-translational modifications	AScore	Found By
P02666|CASB_BOVIN	K.FQS(+79.97)EEQQQTEDEL.Q	38.51	1689.64	13	7.6	845.834	2	26.59	48	60	Phosphorylation (STY)	S3:Phosphorylation (STY):45.03	PEAKS PTM
	L.VYPFPGPI.P	46.11	888.475	8	2.9	889.484	1	40.11	74	81			PEAKS DB
	T.PVVVPPFLQPE(+21.98)V.M	50.48	1341.73	12	1.6	671.874	2	44.95	96	107	Sodium adduct	E11:Sodium adduct:14.02	PEAKS PTM
	T.PVVVPPFLQ(-18.01).P	49.73	976.574	9	2.6	977.584	1	44.88	96	104	Dehydration	Q9:Dehydration:1000.00	PEAKS PTM
	T.PVVVPPFLQPEV(+21.98).M	40.4	1341.73	12	1.6	671.874	2	44.95	96	107	Sodium adduct	V12:Sodium adduct:0.00	PEAKS PTM
	T.PVVVPPF.L	38.06	753.442	7	7	754.455	1	37.51	96	102			PEAKS DB
	T.PVVVPPFLQPEV.M	29.27	1319.75	12	5.5	660.885	2	45.06	96	107			PEAKS DB
	T.PVVVPPFLQPEV(+37.96).M	28.01	1357.7	12	3.2	679.862	2	45.07	96	107	Replacement of proton by potassium	V12:Replacement of proton by potassium:8.14	PEAKS PTM
	V.PPFLQPEV.M	30.85	925.491	8	5.6	926.503	1	45.06	100	107			PEAKS DB
	L.TLTDVEN.L	38.17	790.371	7	2.8	791.38	1	20.95	141	147			PEAKS DB
	M.HQPHQPLPPT.V	25.62	1150.59	10	0.8	576.302	2	20.16	160	169			PEAKS DB
	L.YQEPVLGPV(+21.98).R	33.73	1022.5	9	-2.4	512.259	2	32.36	208	216	Sodium adduct	V9:Sodium adduct:17.08	PEAKS PTM
	Y.Q(-17.03)EPVLGPV.R	47.82	820.433	8	6.2	821.445	1	34.41	209	216	Pyro-glu from Q	Q1:Pyro-glu from Q:1000.00	PEAKS PTM
	Y.QEPVLGPV.R	41.07	837.46	8	6.2	838.472	1	29.56	209	216			PEAKS DB
P02662|CASA1_BOVIN	F.VAPFPEV.F	32.91	757.401	7	3.3	758.411	1	33.67	40	46			PEAKS DB
	L.EIVPNSAEE.R	45.71	986.456	9	0.5	987.463	1	23.14	125	133			PEAKS DB
	L.EIVPNS(+79.97)AEER.L	33.51	1222.52	10	0.7	612.269	2	21.93	125	134	Phosphorylation (STY)	S6:Phosphorylation (STY):1000.00	PEAKS PTM
	Y.Q(-17.03)LDAYPS.G	49.36	775.339	7	3.1	776.348	1	28.19	170	176	Pyro-glu from Q	Q1:Pyro-glu from Q:1000.00	PEAKS PTM
	F.SDIPNPI.G	27.91	754.386	7	2.8	755.395	1	28.79	195	201			PEAKS DB
P02754|LACB_BOVIN	Y.VEELKPTPEGDLE.I	40.37	1454.71	13	-9.3	728.357	2	25.91	59	71			PEAKS DB
	Y.VEELKPTPEGDL.E	39.6	1325.67	12	1.7	663.844	2	26.92	59	70			PEAKS DB
P02663|CASA2_BOVIN	R.NAVPITPT.L	36.47	811.444	8	-2.5	812.449	1	24.2	130	137			PEAKS DB
P02668|CASK_BOVIN	I.ESPPEINT.V	32.2	885.408	8	-6.7	886.409	1	23.04	175	182			PEAKS DB

## Sheet: BasolateralCompartment_N2
Uniprot access number | protein acronym	Amino acid sequences of identified peptides	Peaks Studio score (-10log P)	Theoretical monoisotopic mass (Da)	Length	ppm	m/z	z	Retention time	Start	End	Post-translational modifications	AScore	Found By
P02662|CASA1_BOVIN	F.FVAPFPEV.F	36.85	904.469	8	-0.6	905.474	1	22	39	46			PEAKS DB
	F.VAPFPEVFG.K	53.72	961.491	9	-0.4	962.498	1	22.34	40	48			PEAKS DB
	F.VAPFPEV.F	37	757.401	7	-6	758.404	1	18.67	40	46			PEAKS DB
	P.Q(-17.03)LEIVPN.S	54.52	794.417	7	-5.2	795.42	1	19.84	123	129	Pyro-glu from Q	Q1:Pyro-glu from Q:1000.00	PEAKS PTM
	L.EIVPNS(+79.97)AEER.L	54.32	1222.52	10	2.7	612.269	2	11.89	125	134	Phosphorylation (STY)	S6:Phosphorylation (STY):1000.00	PEAKS PTM
	L.EIVPNSAEE.R	44.22	986.456	9	2.5	987.463	1	12.51	125	133			PEAKS DB
	L.EIVPNSAEER.L	35.6	1142.56	10	-1.7	572.285	2	11.73	125	134			PEAKS DB
	Y.Q(-17.03)LDAYPS.G	46.04	775.339	7	0.7	776.347	1	16.32	170	176	Pyro-glu from Q	Q1:Pyro-glu from Q:1000.00	PEAKS PTM
	Y.QLDAYPS.G	31.36	792.365	7	0.2	793.373	1	13.11	170	176			PEAKS DB
	F.SDIPNPI.G	28.61	754.386	7	4.6	755.395	1	15.82	195	201			PEAKS DB
P02663|CASA2_BOVIN	K.NMAINPS.K	37.77	745.343	7	-3.8	746.347	1	12.58	40	46			PEAKS DB
	R.NAVPITPT.L	42.08	811.444	8	-1.3	812.45	1	13.52	130	137			PEAKS DB
	R.N(+.98)AVPITPT.L	39.18	812.428	8	4.5	813.439	1	14.41	130	137	Deamidation (NQ)	N1:Deamidation (NQ):1000.00	PEAKS PTM
	K.TVDMESTEV.F	34.62	1009.43	9	-1	1010.43	1	14.07	153	161			PEAKS DB
P02666|CASB_BOVIN	L.VYPFPGPIPN.S	55.16	1099.57	10	2.8	1100.58	1	20.53	74	83			PEAKS DB
	L.VYPFPGPI.P	47.31	888.475	8	-3.3	889.479	1	22	74	81			PEAKS DB
	N.SLPQNIPPLTQTPV.V	31.76	1503.83	14	-3.1	752.918	2	19.69	84	97			PEAKS DB
	Q.NIPPLTQT.P	36.75	882.481	8	-0.2	883.488	1	14.83	88	95			PEAKS DB
	T.PVVVPPFLQPEV.M	62.61	1319.75	12	0.9	1320.76	1	24.5	96	107			PEAKS DB
	T.PVVVPPFLQPEV(+21.98).M	57.86	1341.73	12	-4.3	671.868	2	24.48	96	107	Sodium adduct	V12:Sodium adduct:8.14	PEAKS PTM
	T.PVVVPPFLQ(-18.01).P	57.07	976.574	9	3.3	977.583	1	24.48	96	104	Dehydration	Q9:Dehydration:1000.00	PEAKS PTM
	T.PVVVPPFLQPE(+21.98)V.M	52.43	1341.73	12	-3.7	671.87	2	24.48	96	107	Sodium adduct	E11:Sodium adduct:0.00	PEAKS PTM
	T.PVVVPPFLQPE(+21.98).V	48.02	1242.66	11	1.2	622.338	2	23.11	96	106	Sodium adduct	E11:Sodium adduct:1000.00	PEAKS PTM
	T.PVVVPPF.L	45.86	753.442	7	1.8	754.451	1	20.8	96	102			PEAKS DB
	T.PVVVPPFLQPE(+37.95)V.M	30.58	1357.7	12	1.2	679.856	2	24.52	96	107	Replacement of 2 protons by calcium	E11:Replacement of 2 protons by calcium:9.34	PEAKS PTM
	V.VVPPFLQPEV.M	46.59	1123.63	10	4	1124.64	1	22.19	98	107			PEAKS DB
	V.VVPPFLQ(-18.01).P	37.48	780.453	7	-2.7	781.457	1	22.17	98	104	Dehydration	Q7:Dehydration:1000.00	PEAKS PTM
	V.PPFLQPEV.M	35.27	925.491	8	-3.2	926.495	1	24.52	100	107			PEAKS DB
	L.TLTDVEN.L	41.33	790.371	7	1.1	791.377	1	11.41	141	147			PEAKS DB
	W.MHQPHQPLPPT.V	29.9	1281.63	11	-2.1	641.819	2	11.3	159	169			PEAKS DB
	M.HQPHQPLPPT.V	28.27	1150.59	10	-6.2	576.297	2	10.28	160	169			PEAKS DB
	L.YQEPVLGPV.R	53.98	1000.52	9	-2.6	1001.53	1	18.03	208	216			PEAKS DB
	Y.Q(-17.03)EPVLGPV.R	62.58	820.433	8	-6.3	821.435	1	19.68	209	216	Pyro-glu from Q	Q1:Pyro-glu from Q:1000.00	PEAKS PTM
	Y.QEPVLGPV.R	47.77	837.46	8	-0.6	838.466	1	16.54	209	216			PEAKS DB
P02668|CASK_BOVIN	I.ESPPEINT.V	28.58	885.408	8	0.3	886.415	1	12.7	175	182			PEAKS DB
P02672|FIBA_BOVIN	T.EDGSDPPSGDFLTEGGGV.R	30.06	1734.72	18	-2.9	868.364	2	18.2	20	37			PEAKS DB
P02754|LACB_BOVIN	Y.VEELKPTPE.G	27.89	1040.54	9	-2.2	521.274	2	11.7	59	67			PEAKS DB

## Sheet: Title
Table S2. List of identified peptides in CPP preparation, Apical compartment (replicates 1 and 2, N1 and N2) and basolateral compartment (replicates 1 and 2, N1 and N2). Start is the location of the first AA of the peptide on the protein sequence; End is the location of the last AA of the peptide on the protein sequence; Ascore is the ambiguity score for modification sites; ppm, parts per million…
