# Supplementary material for: Digested casein phosphopeptides impact intestinal calcium transport in vitro
Source: Royal Society of Chemistry journal article supplement (doi:10.1039/d4fo01637h), 2024-01-01
Supplement: d4fo01637h2.pdf [file d4fo01637h2.pdf]

Supplemental Figure 1.

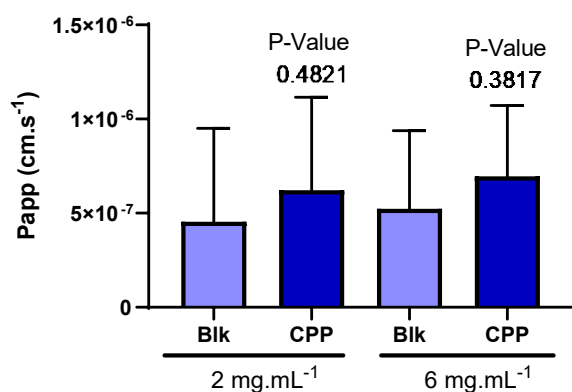

Supplemental Figure 1. Effect of digested CPP on intestinal membrane permeability

The co-culture of Caco-2/HT29-MTX cells was grown on inserts for 3 weeks. Subsequently, cells were incubated for 2 hours with dCPPp at concentrations of 2 and 6 mg/mL, resulting in final calcium concentrations of 1.6 and 4.6 mM, respectively, in the apical compartment. After the incubation period, the apparent permeability of the cell monolayers was measured using lucifer yellow, with the results expressed in cm.sec<sup>-1</sup>. For each condition, results were analyzed by t-test in comparison to the "Blk" condition (Blank SGID). Data are presented as mean ± SD of four independent experiments (\*\* p<0.01, t-test).
